# Supplementary material for: Chromosome-level genome assembly of Tarim red deer, Cervus elaphus yarkandensis
Source: PubMed Central journal article supplement (PMC7305323; doi:10.1038/s41597-020-0537-0), 2020-06-19

**Fig. S1** Reconstructed 34 chromosomes of the Tarim red deer genome (CEY\_v1) using the published high quality genetic linkage maps by Johnston, et al., 2017.

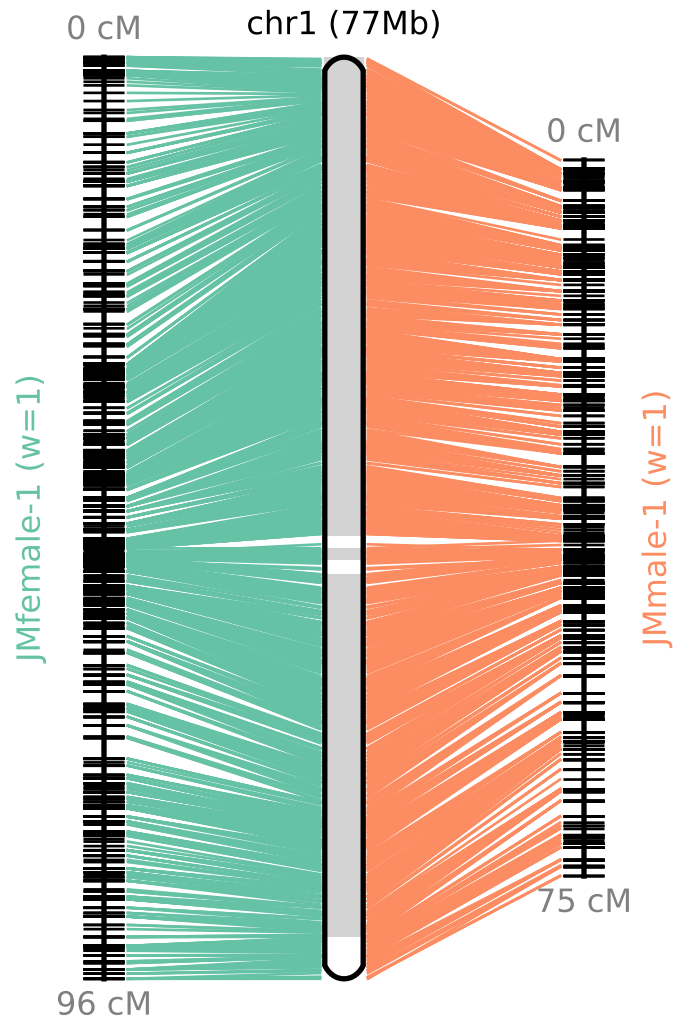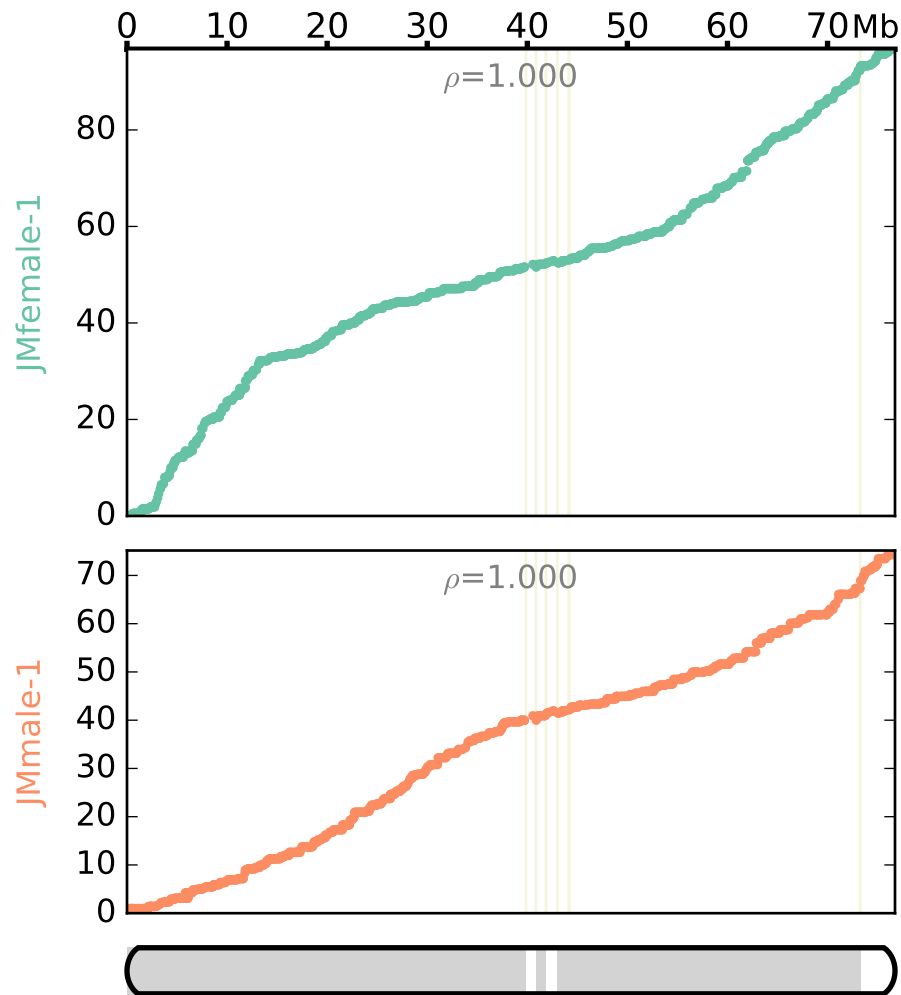

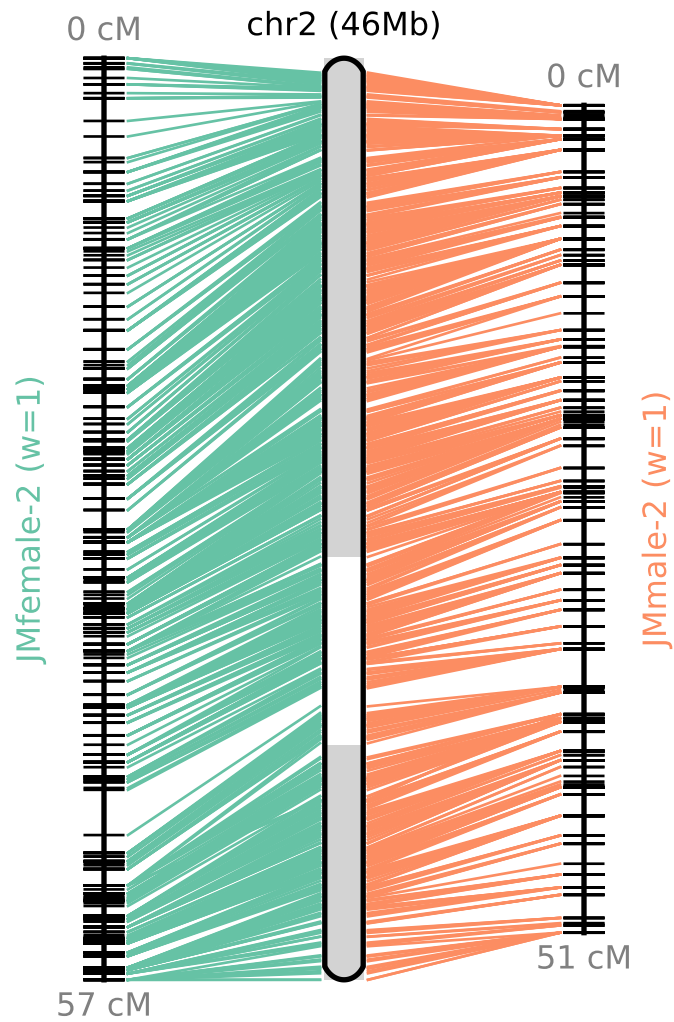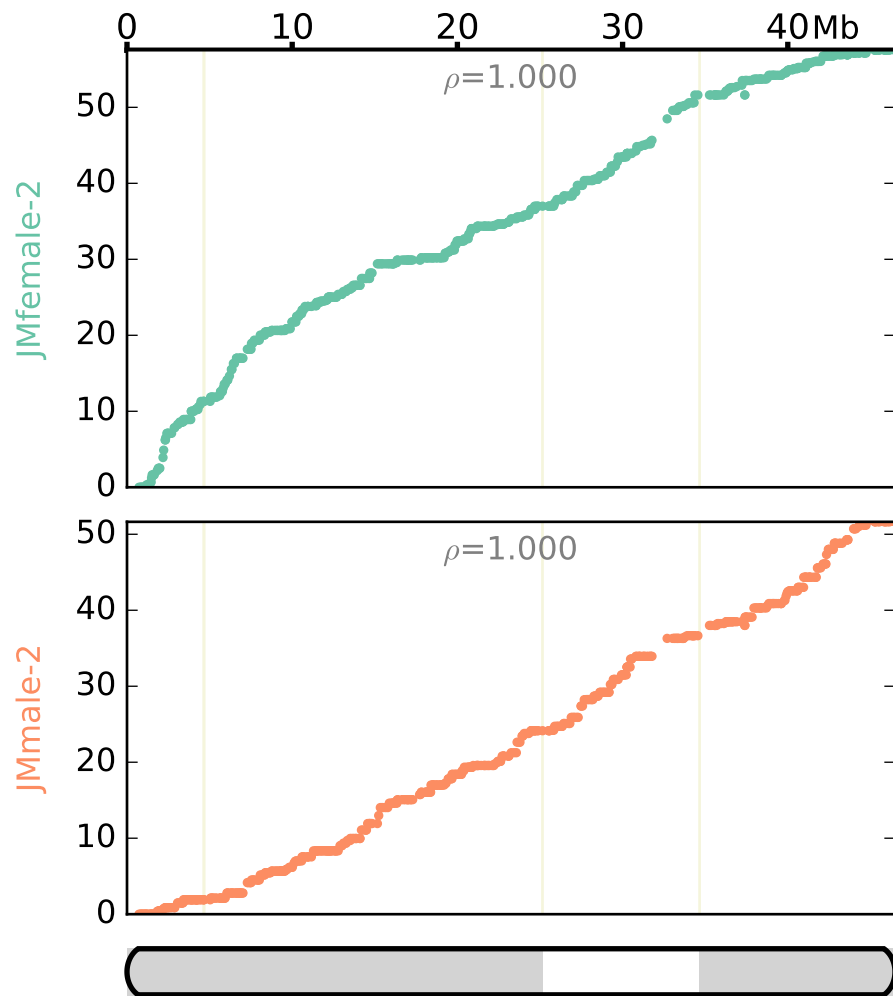

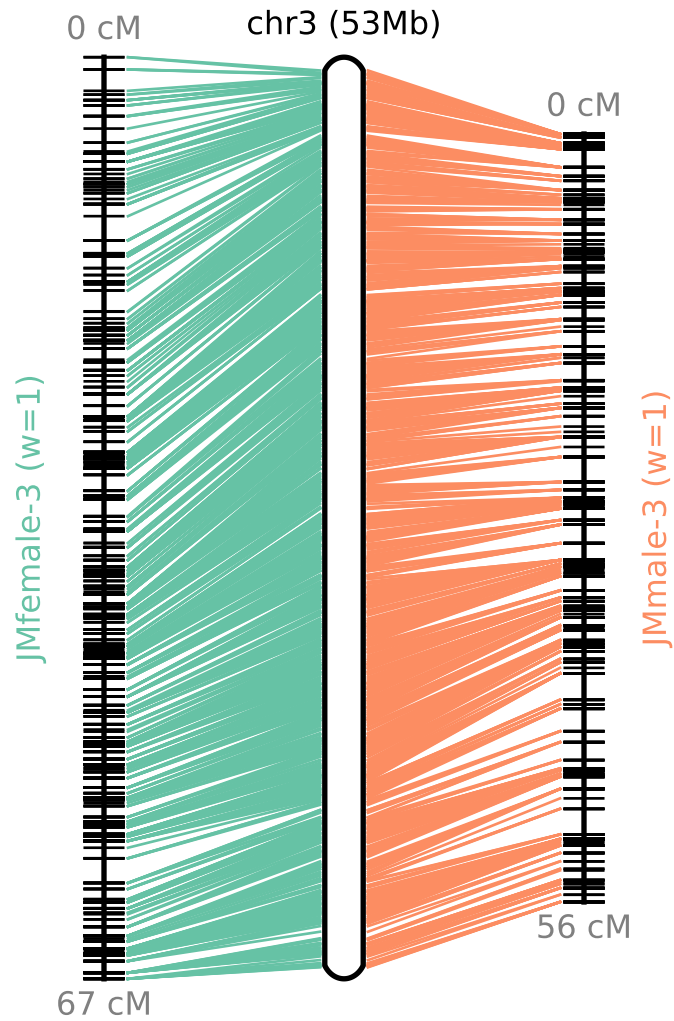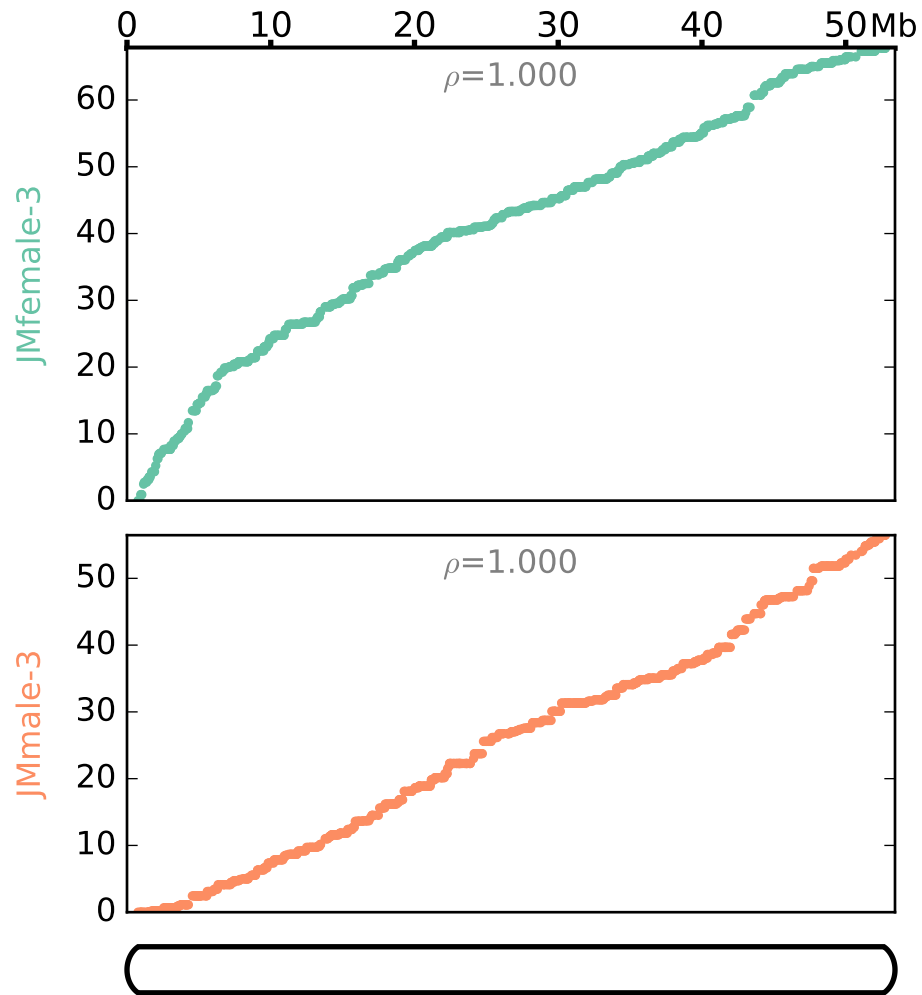

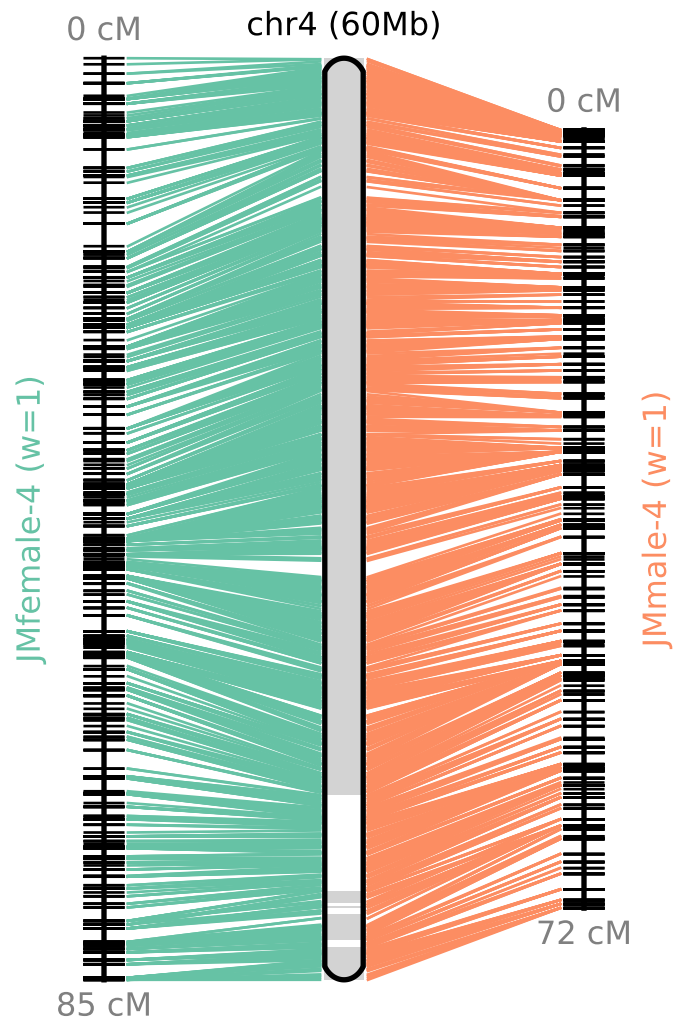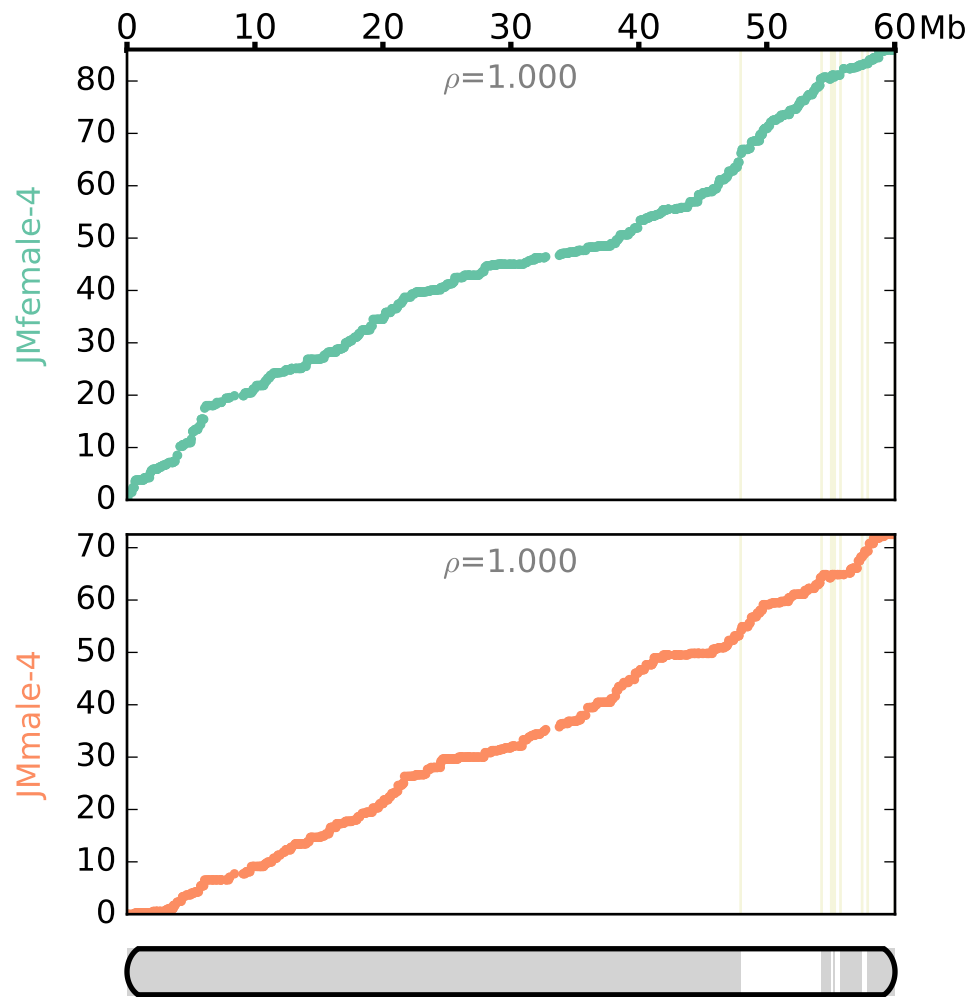

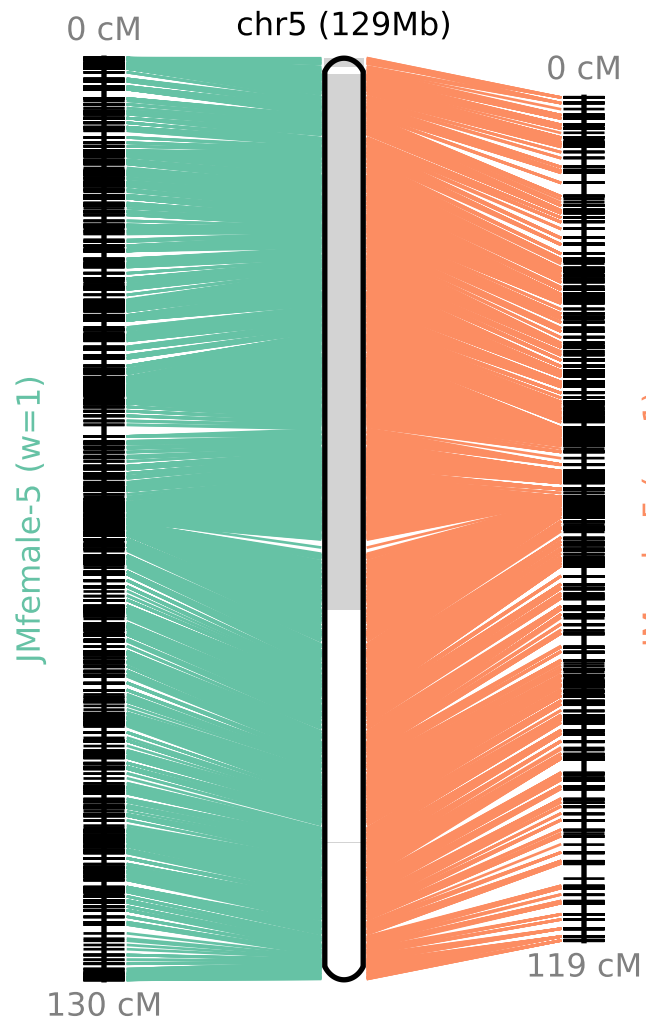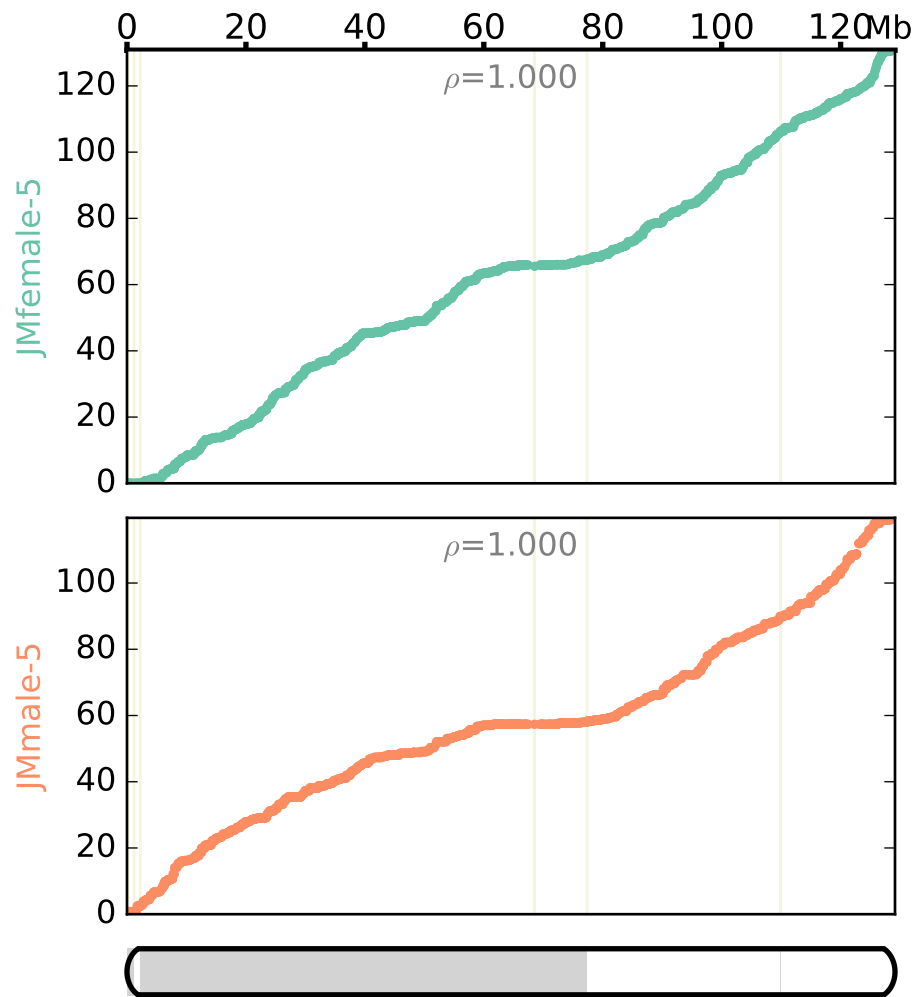

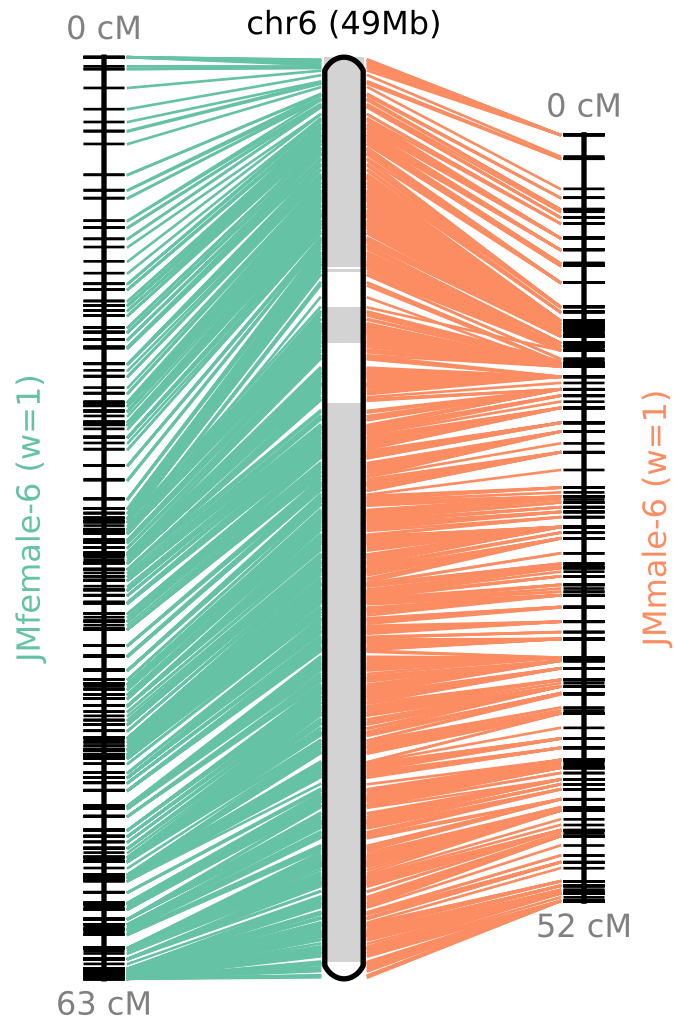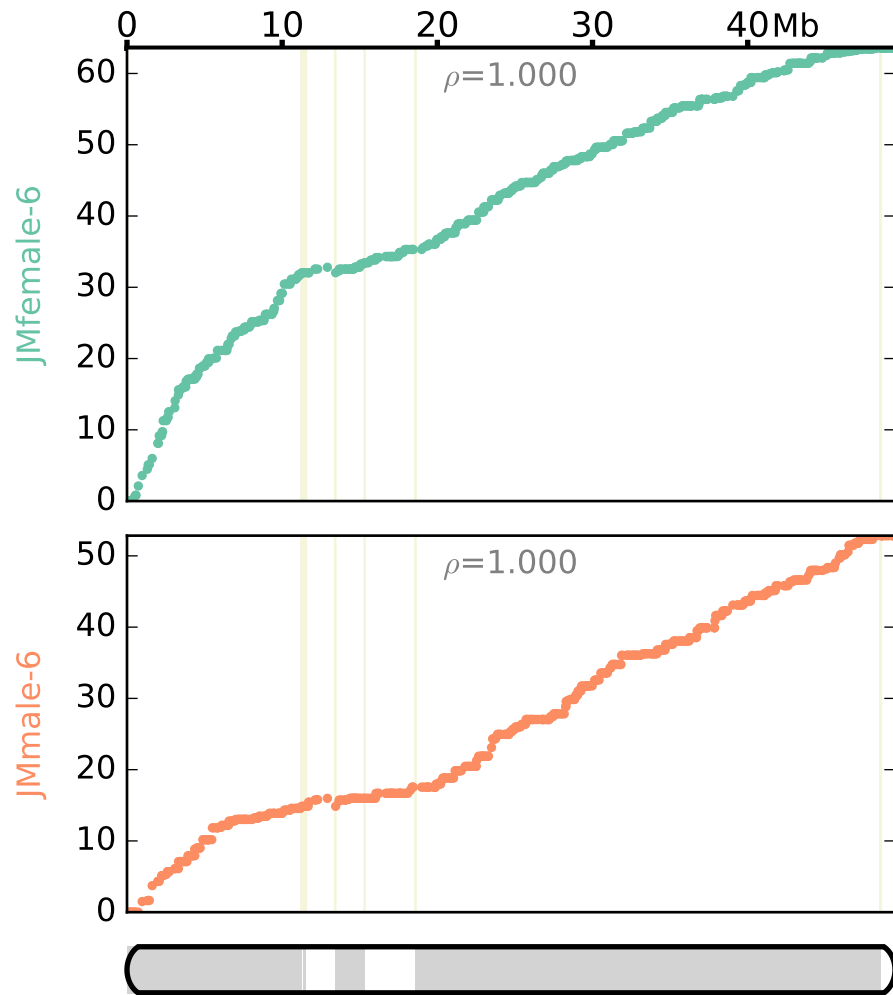

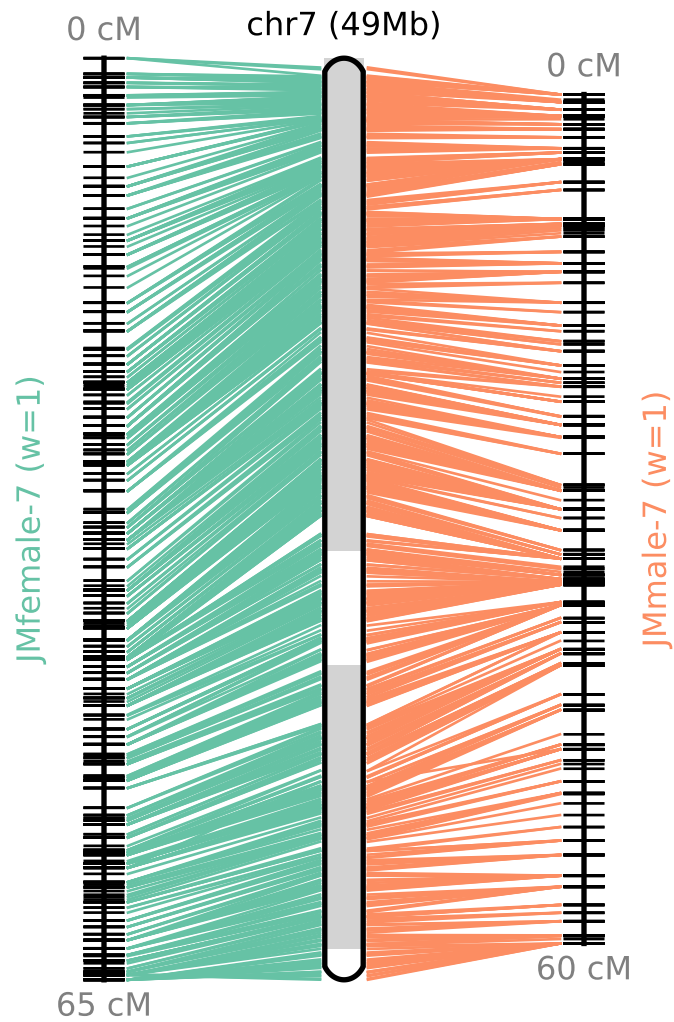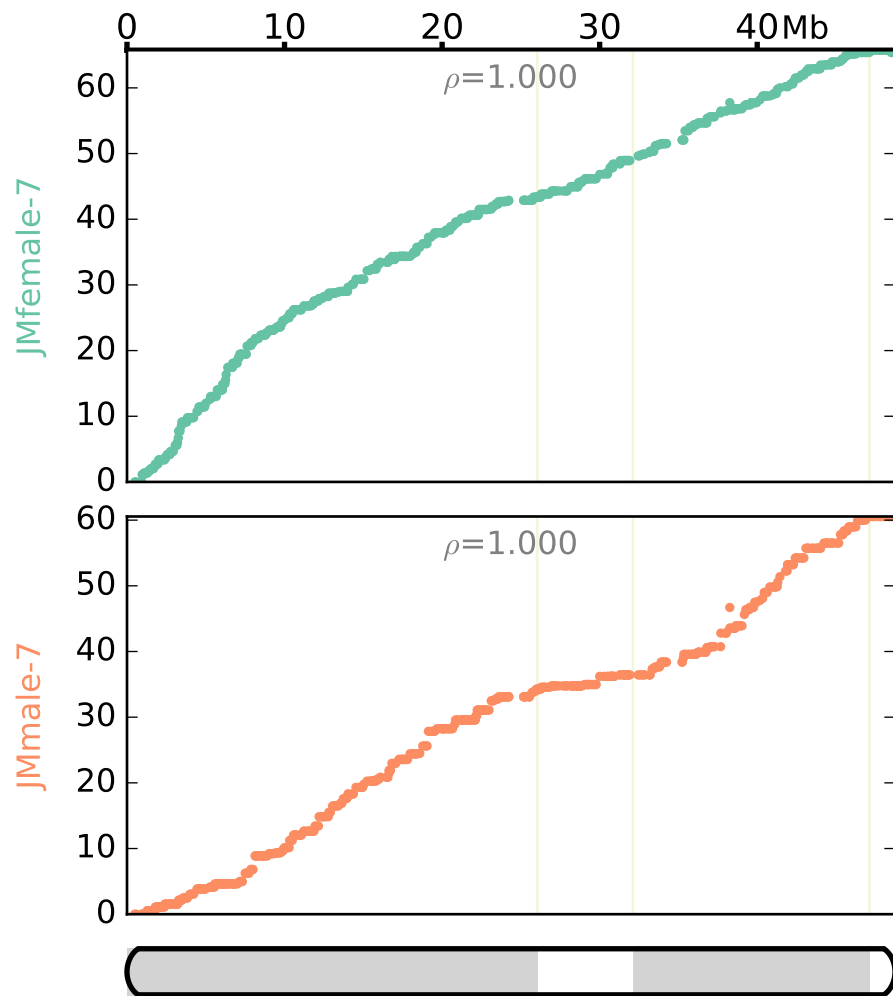



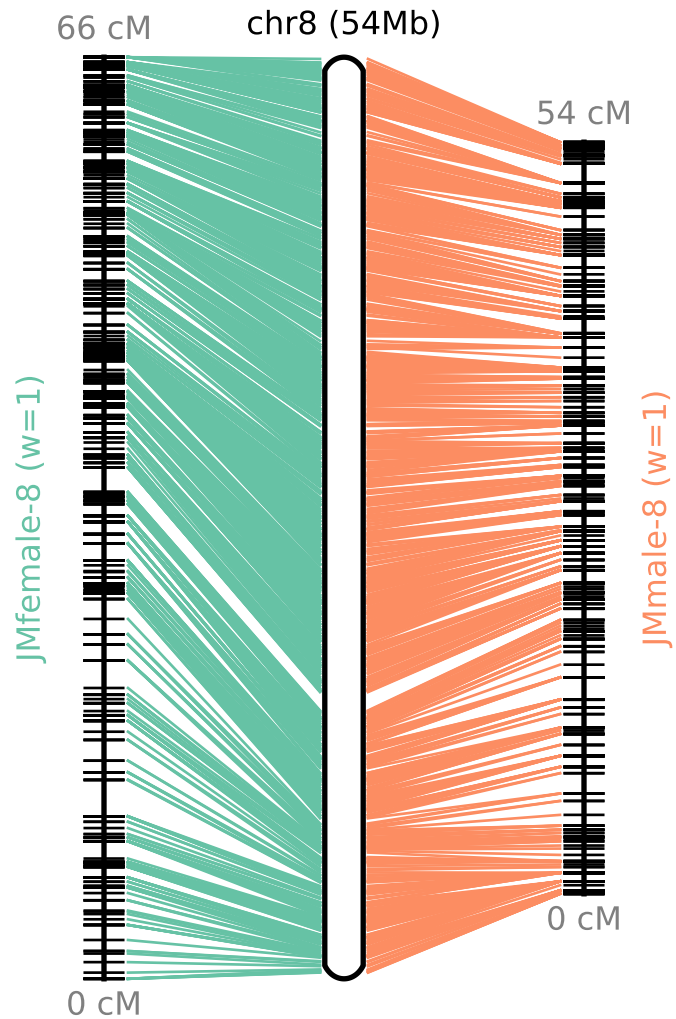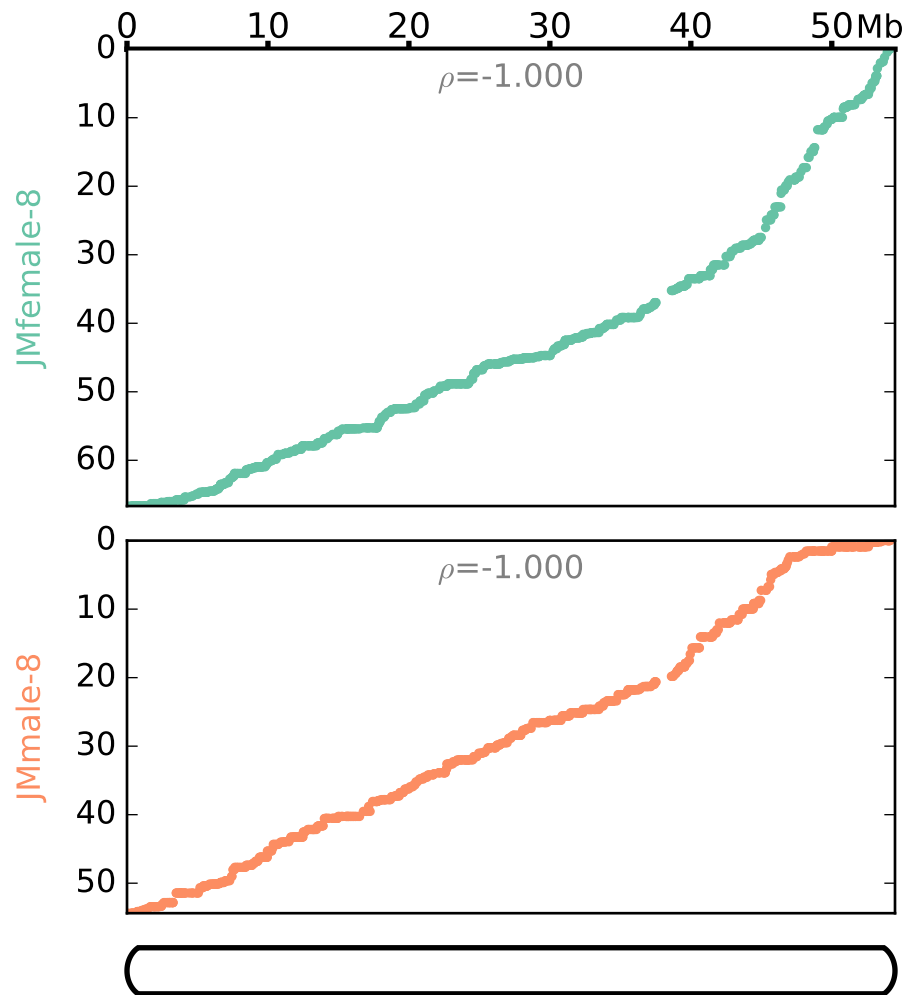

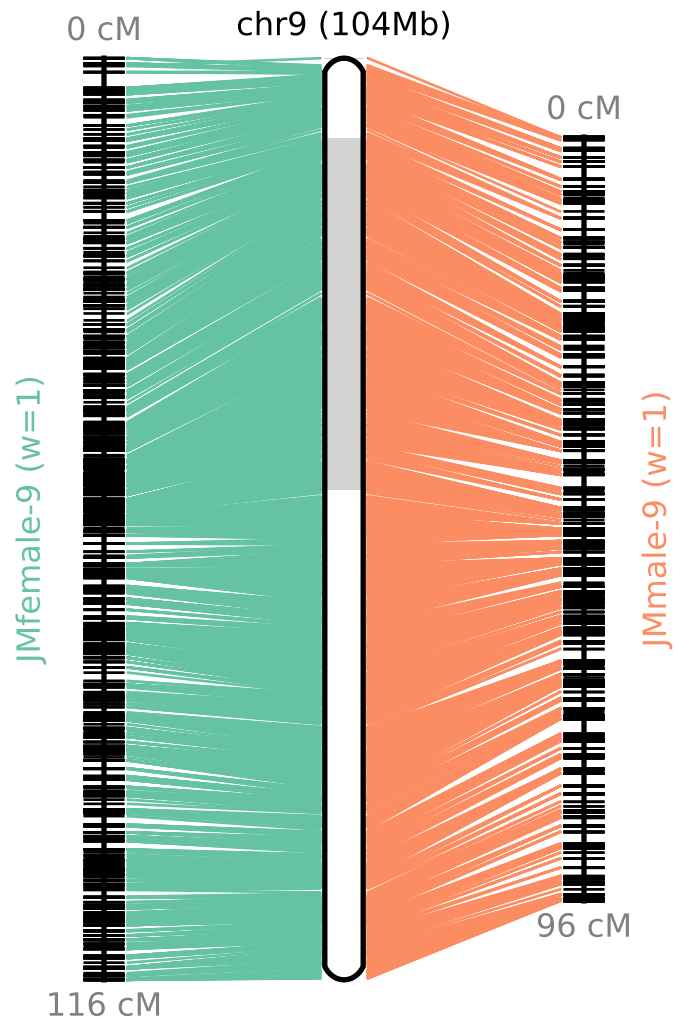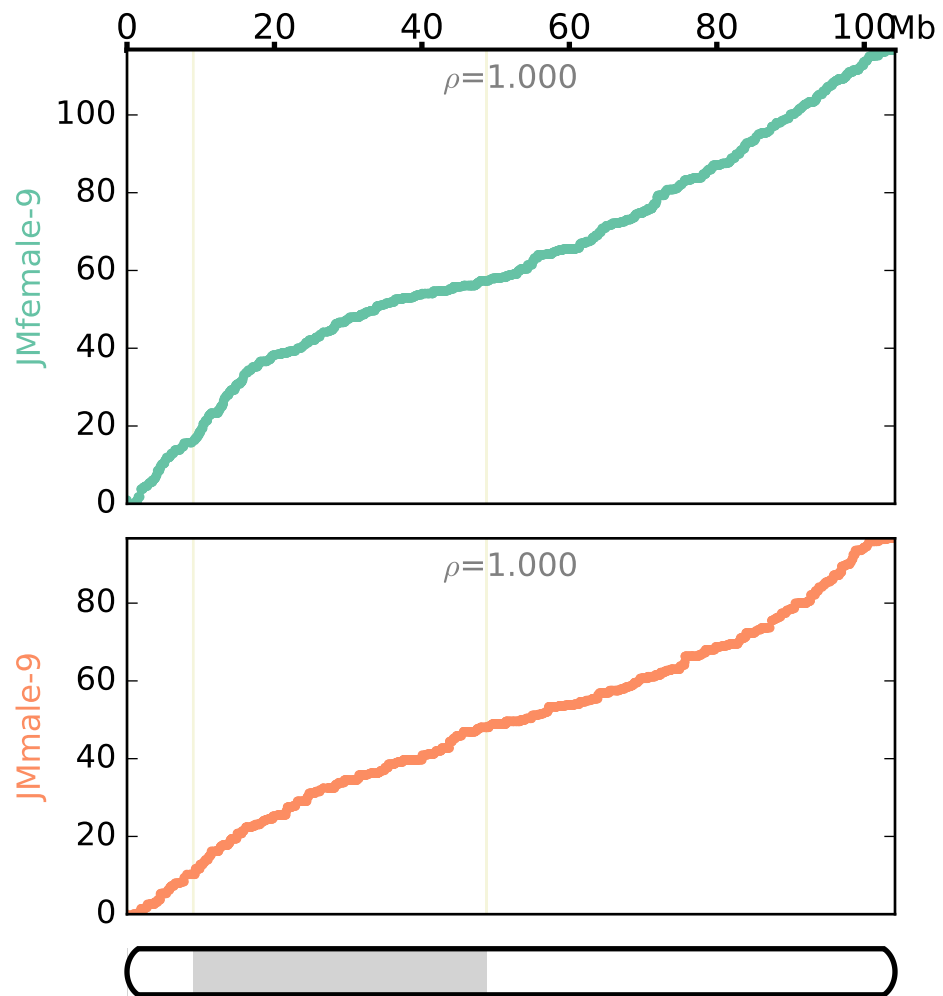

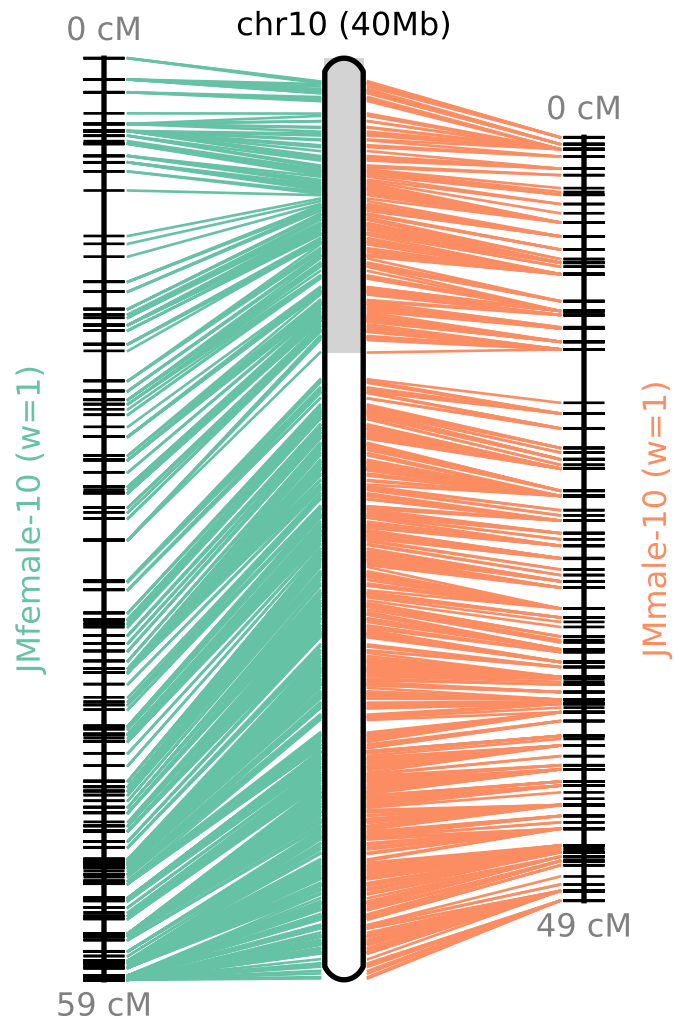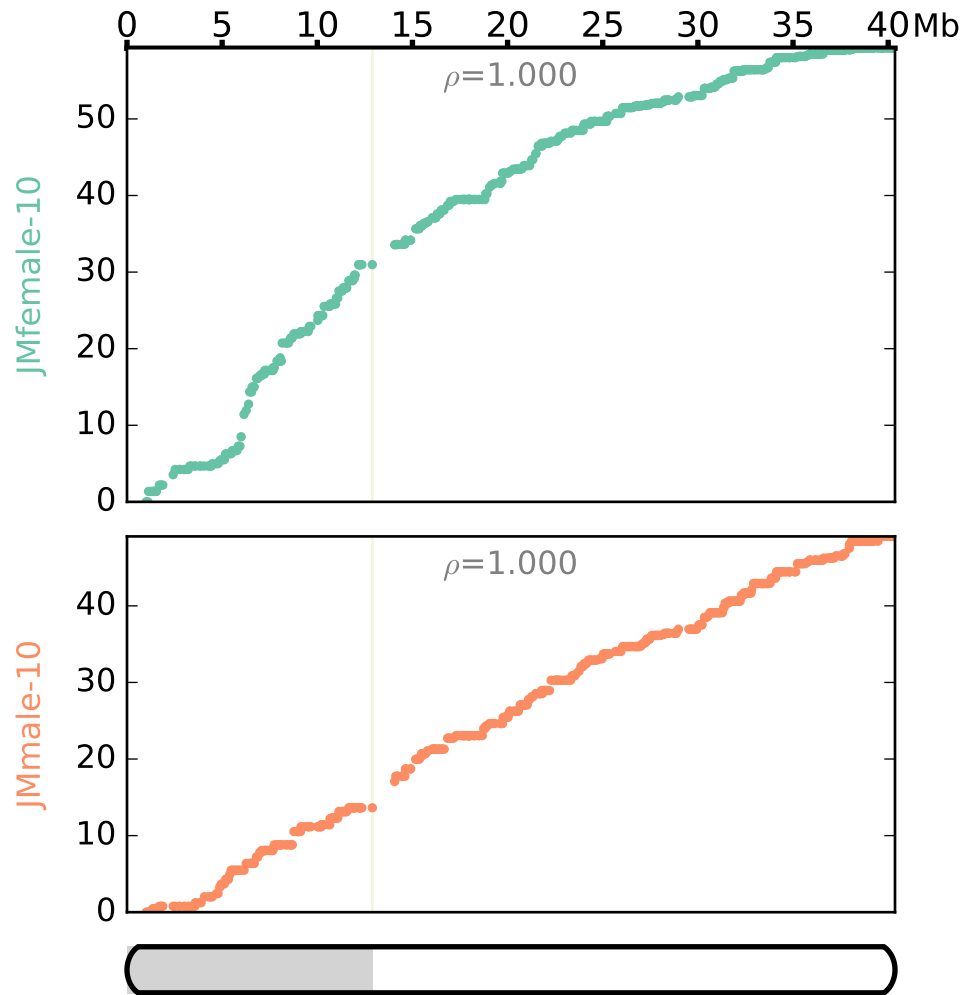

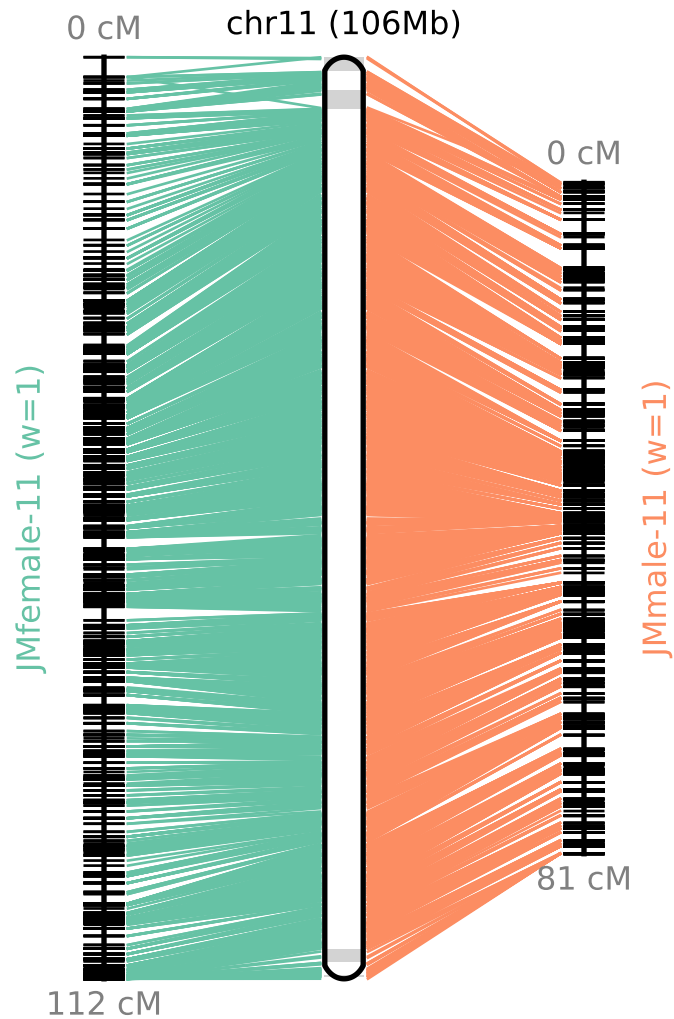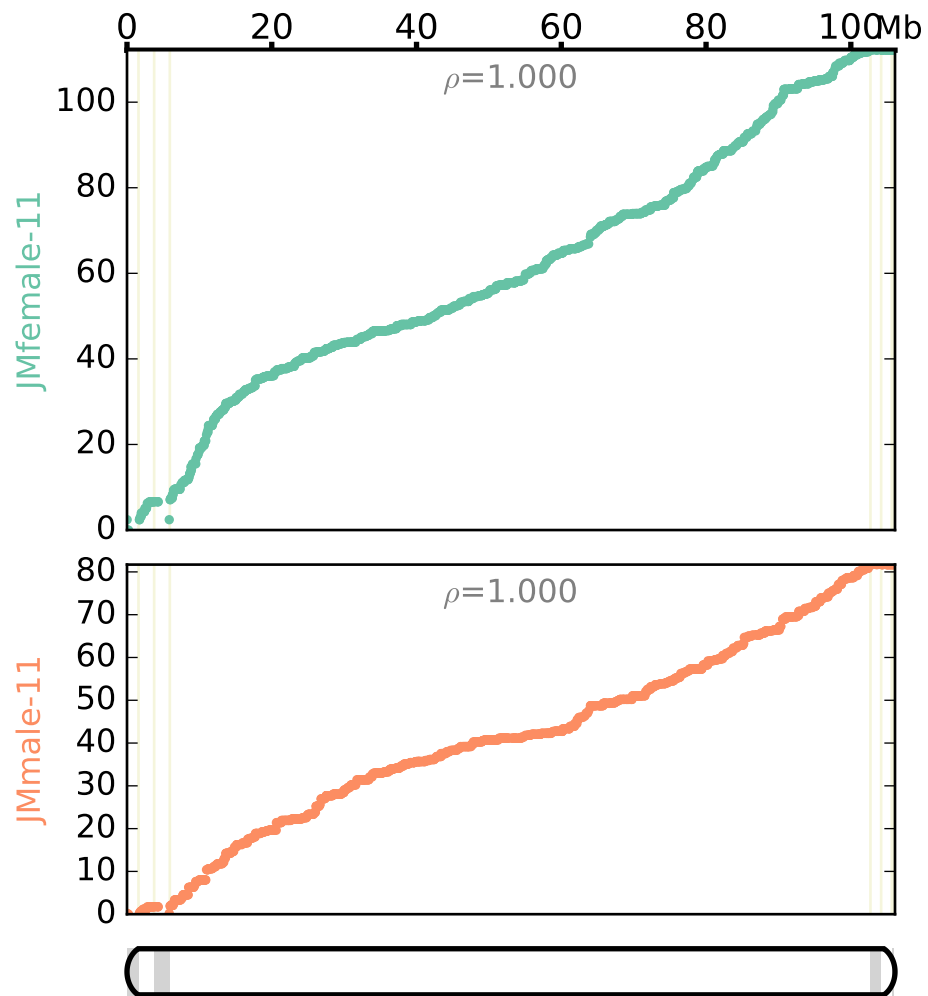

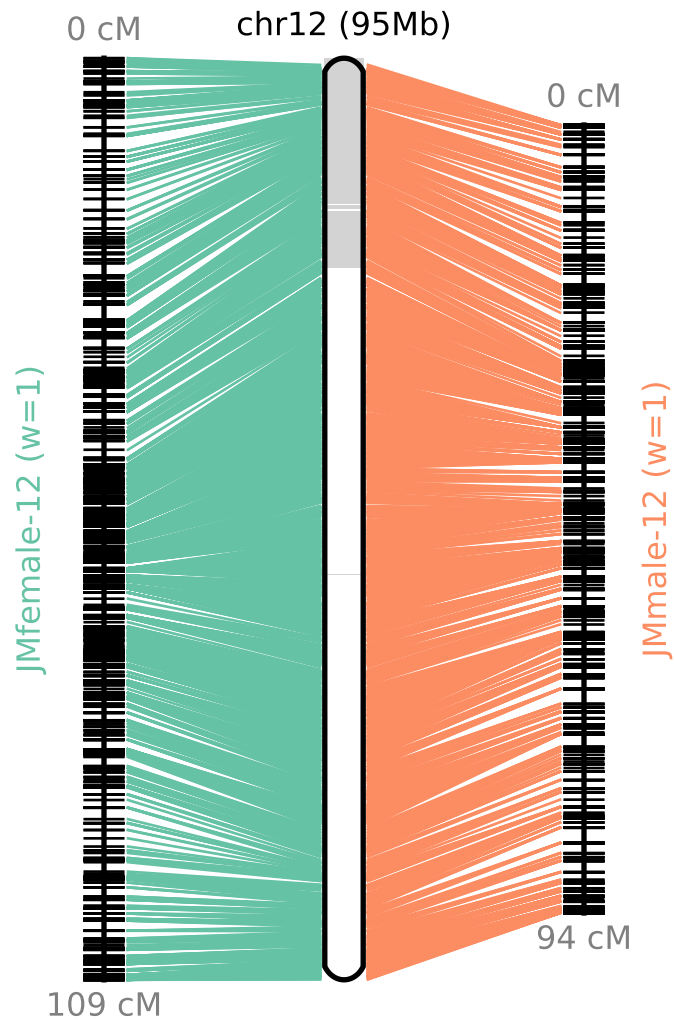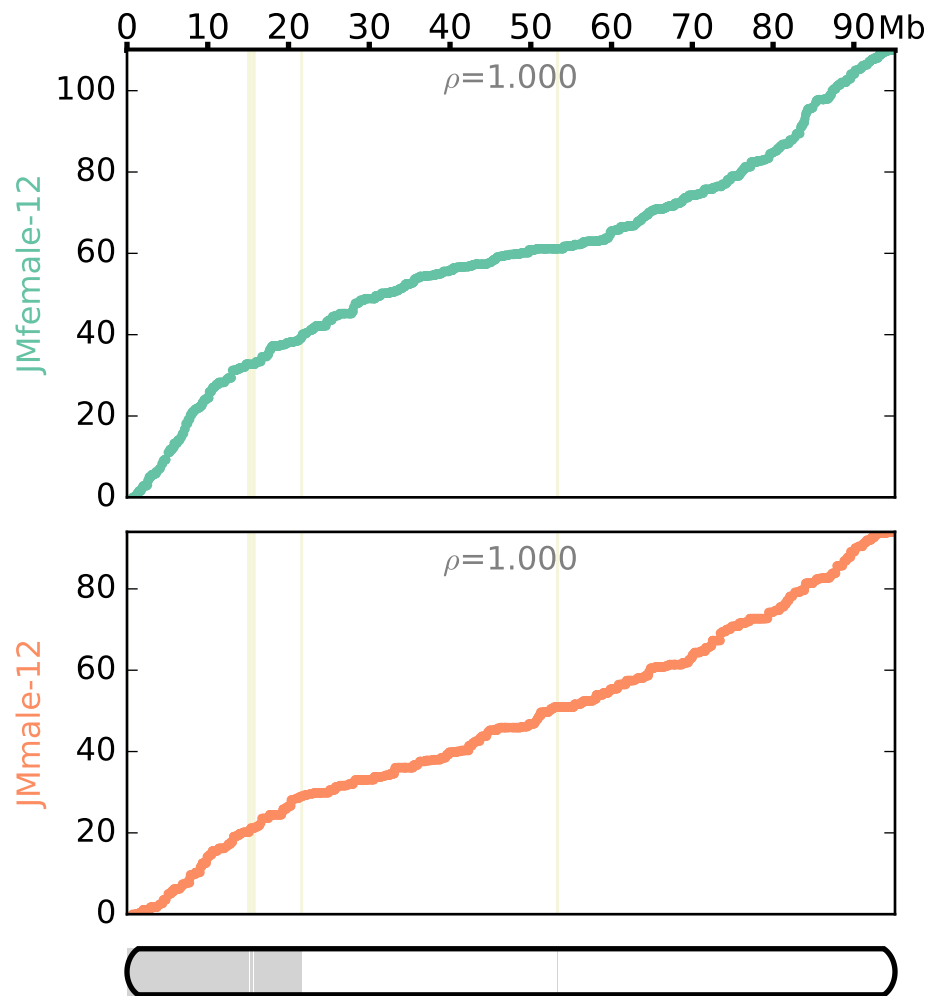

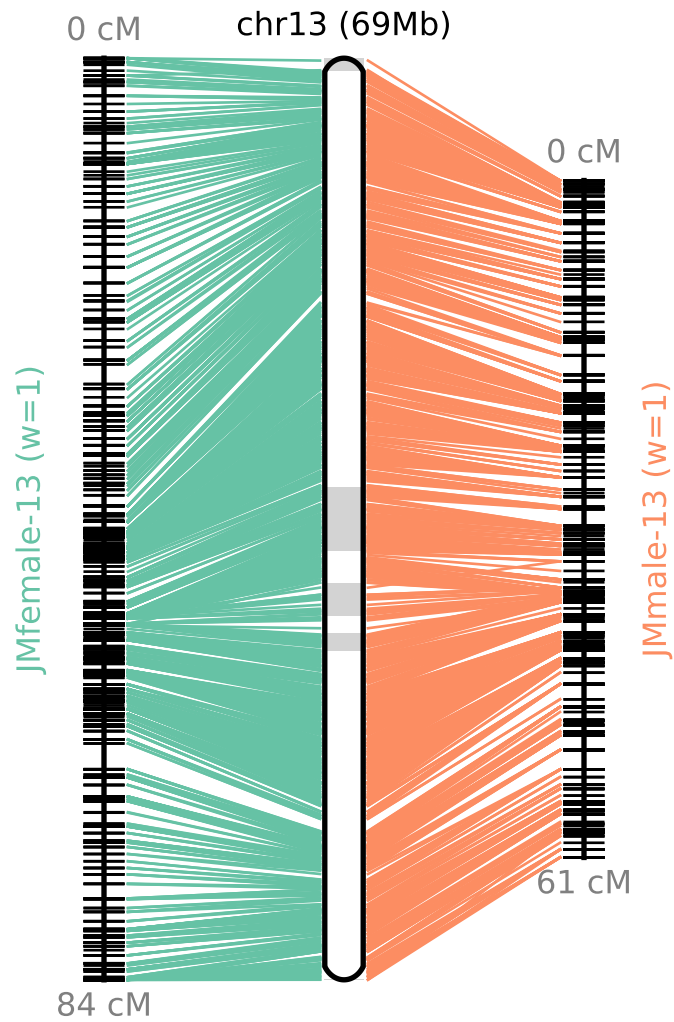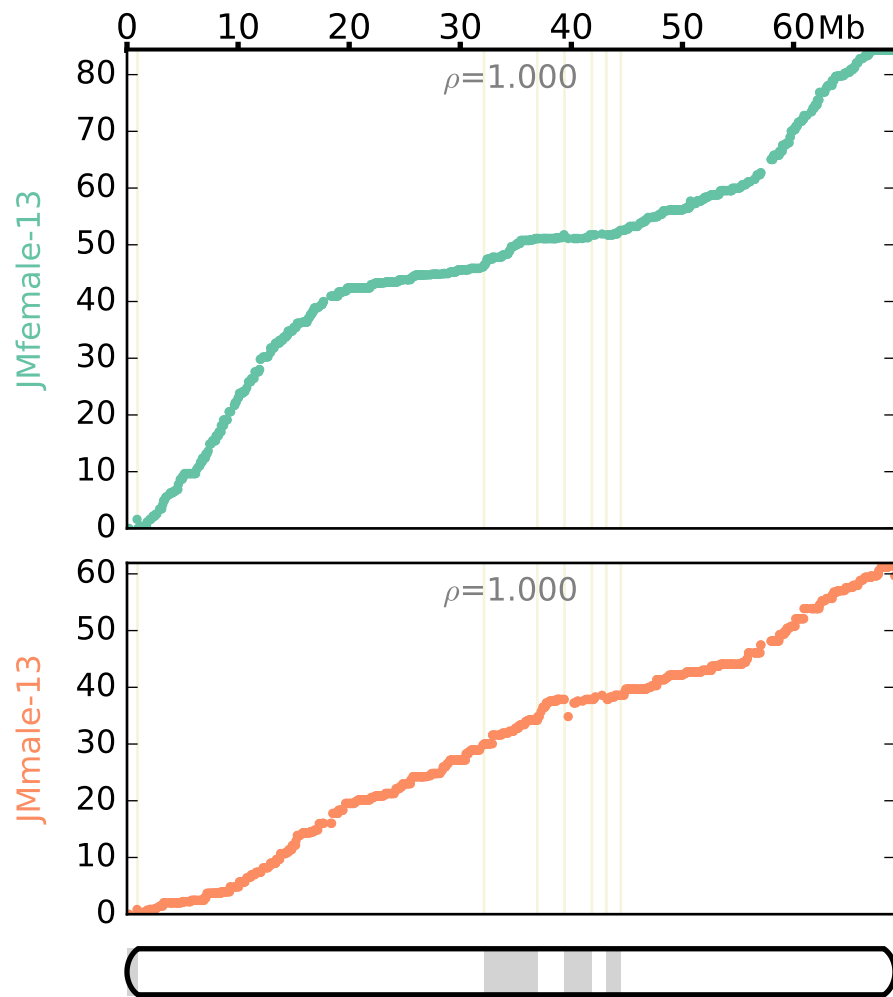

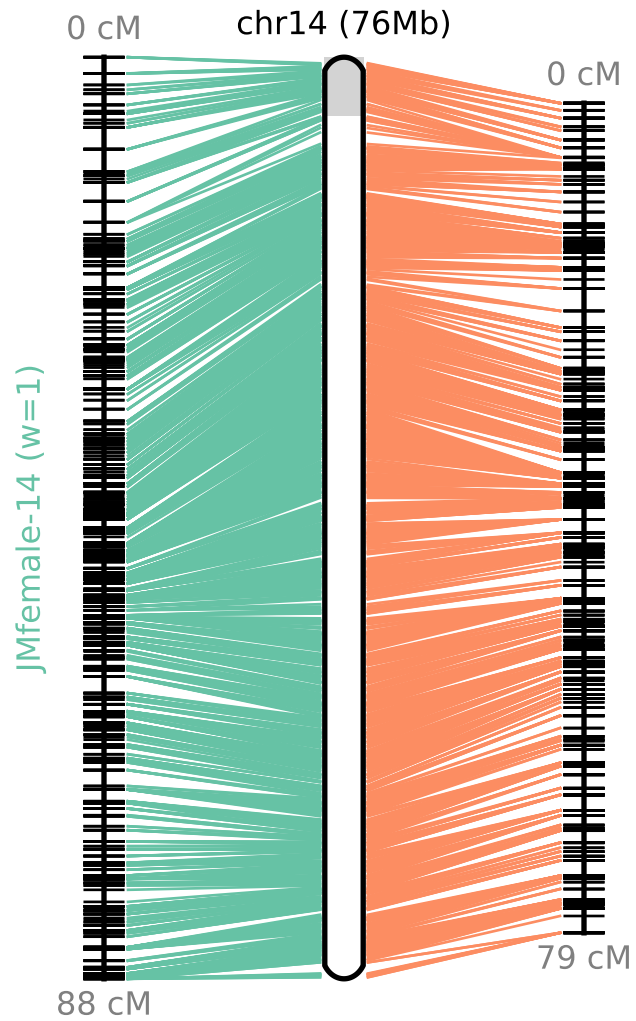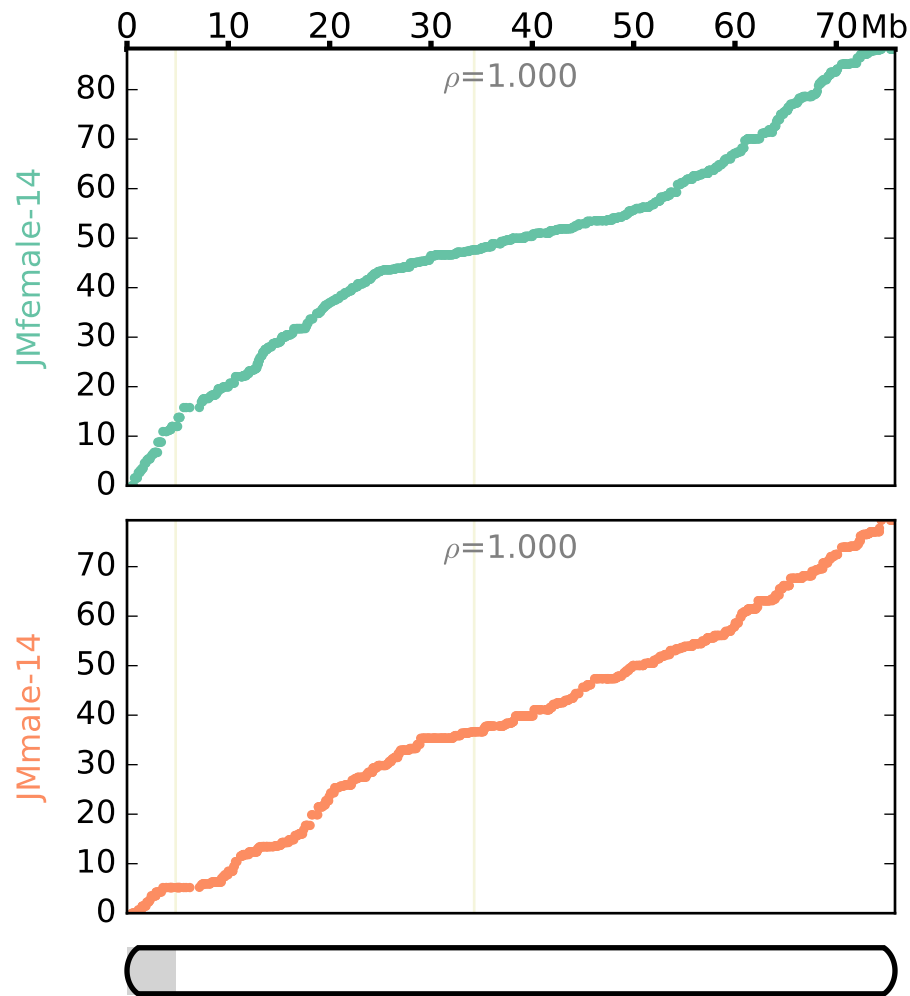

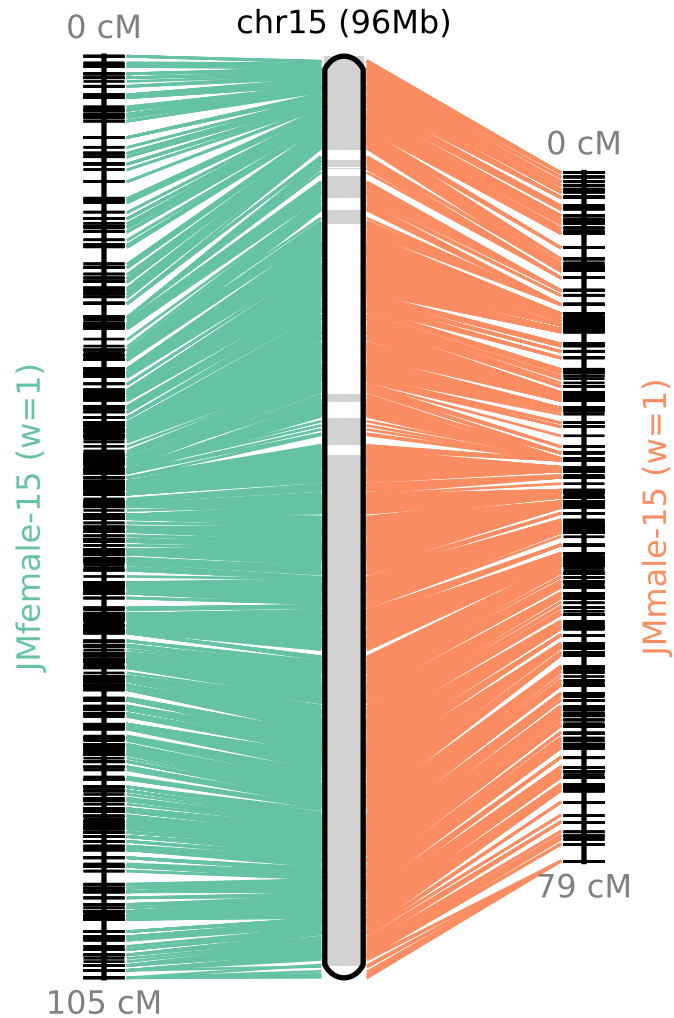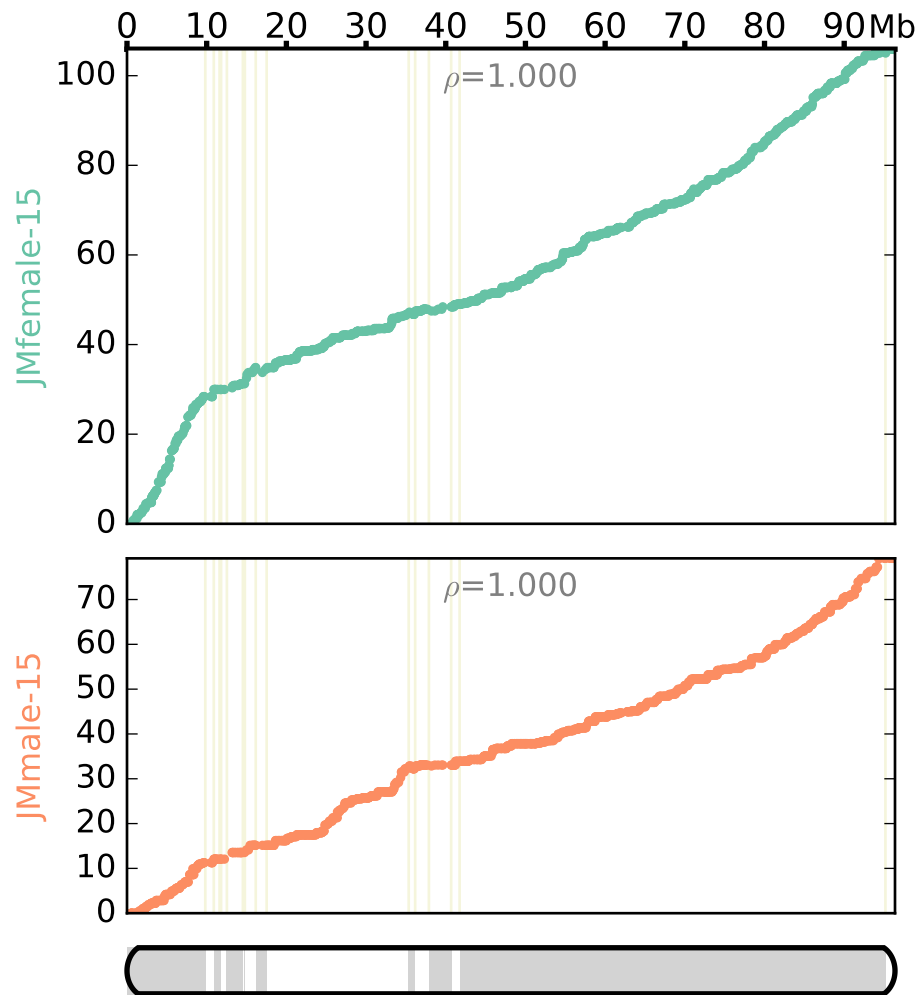



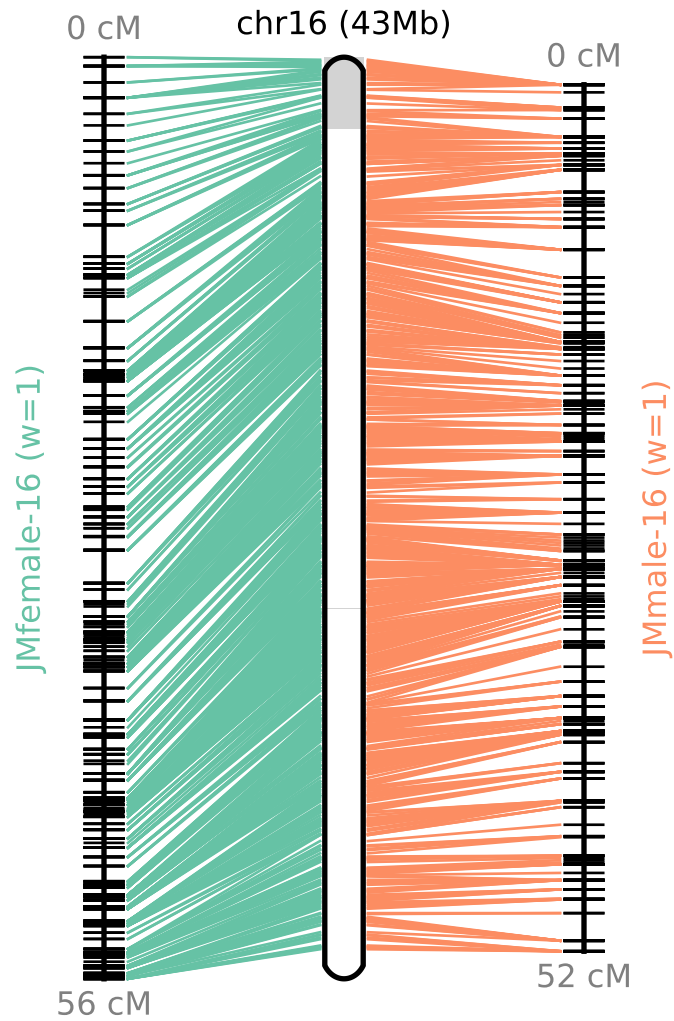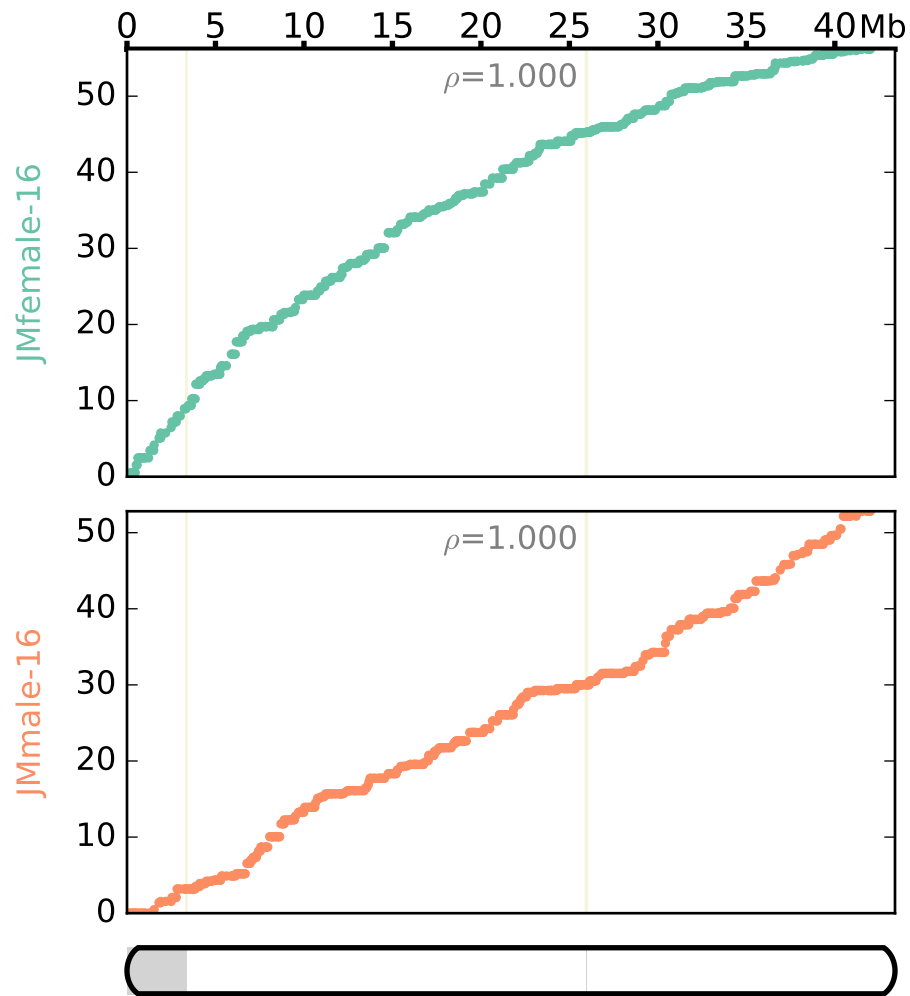

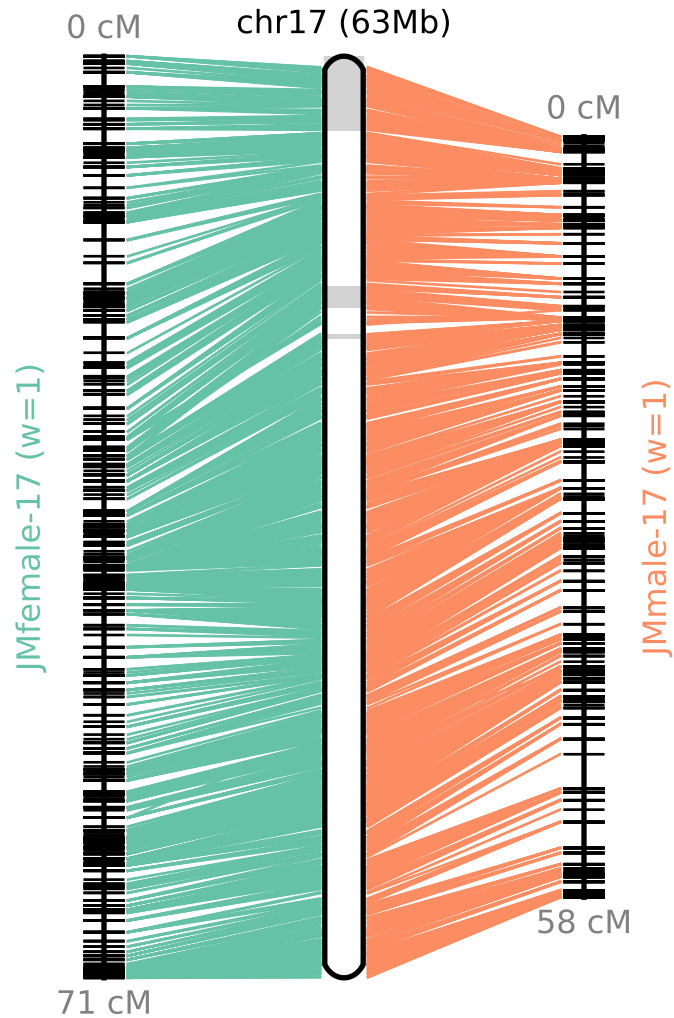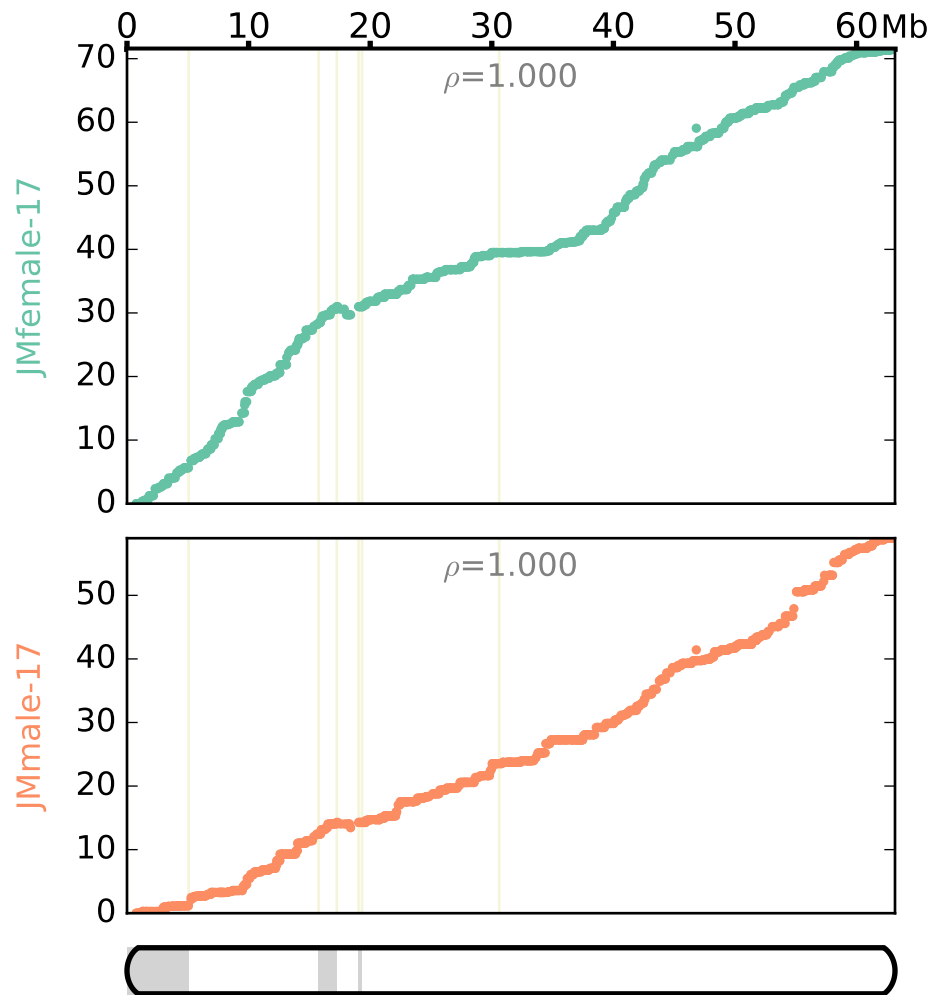

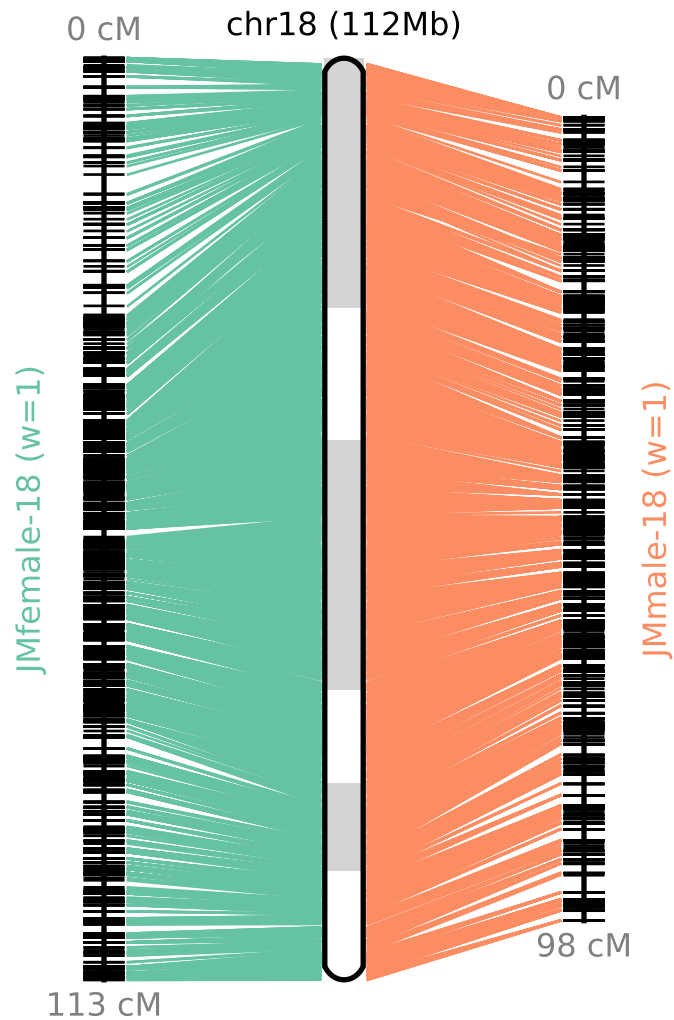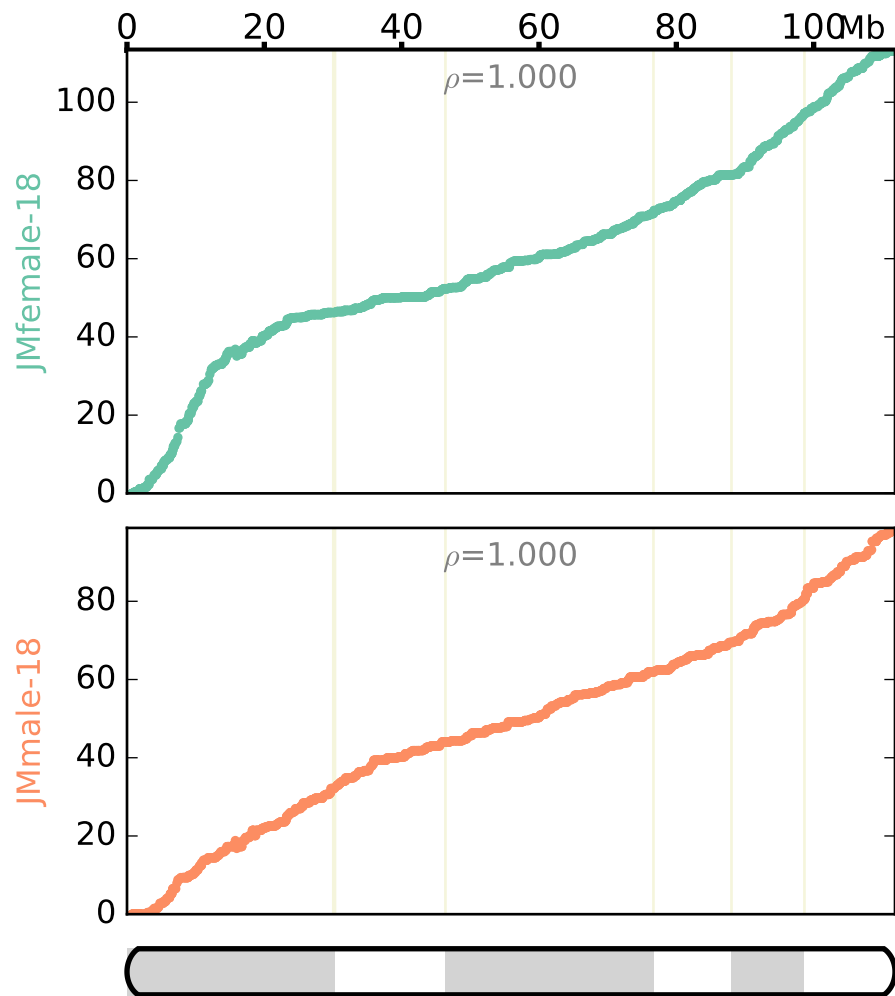

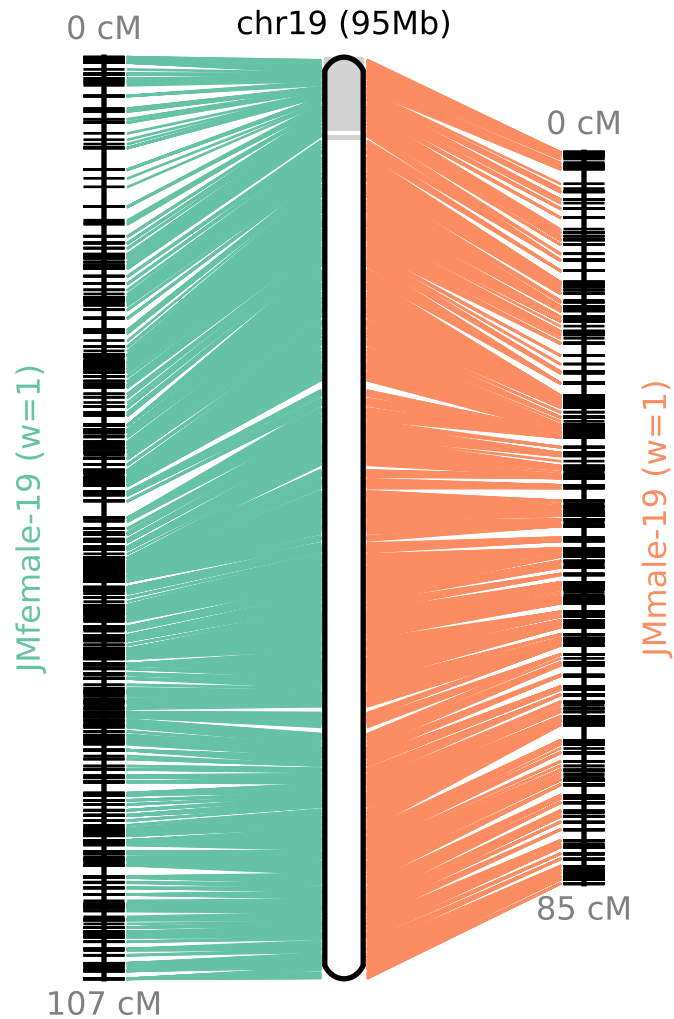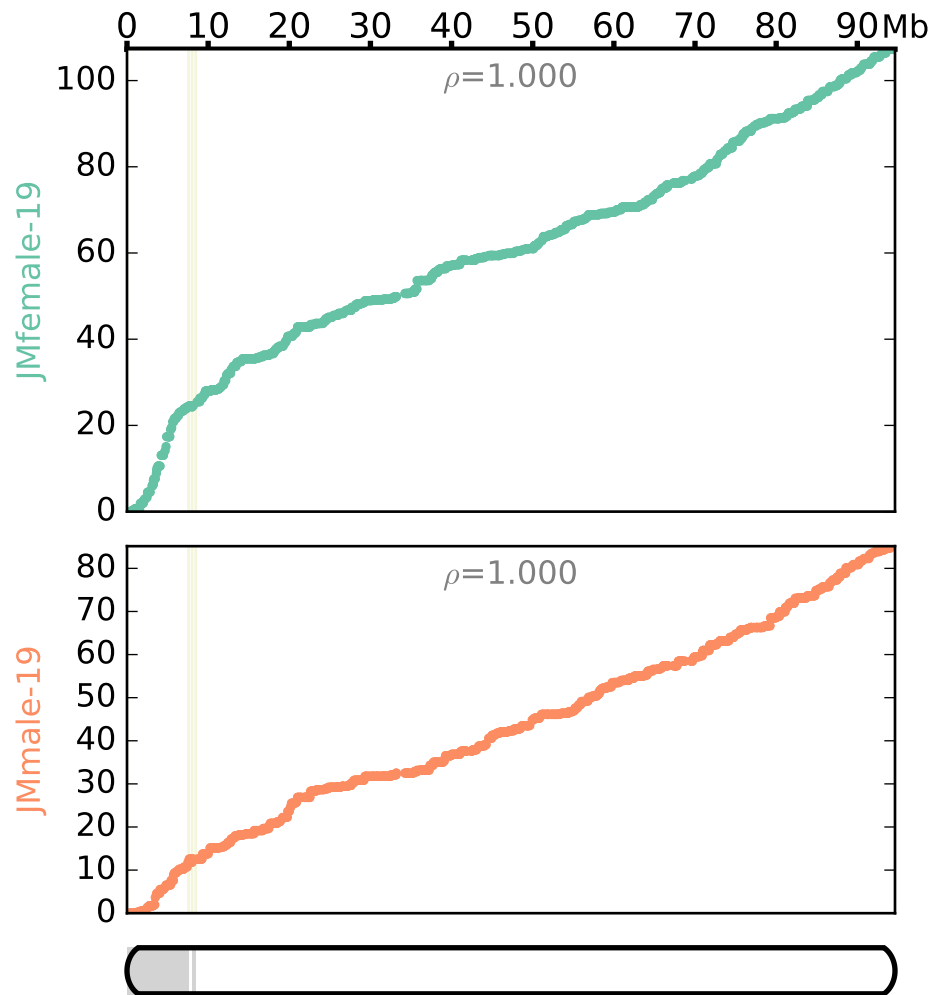

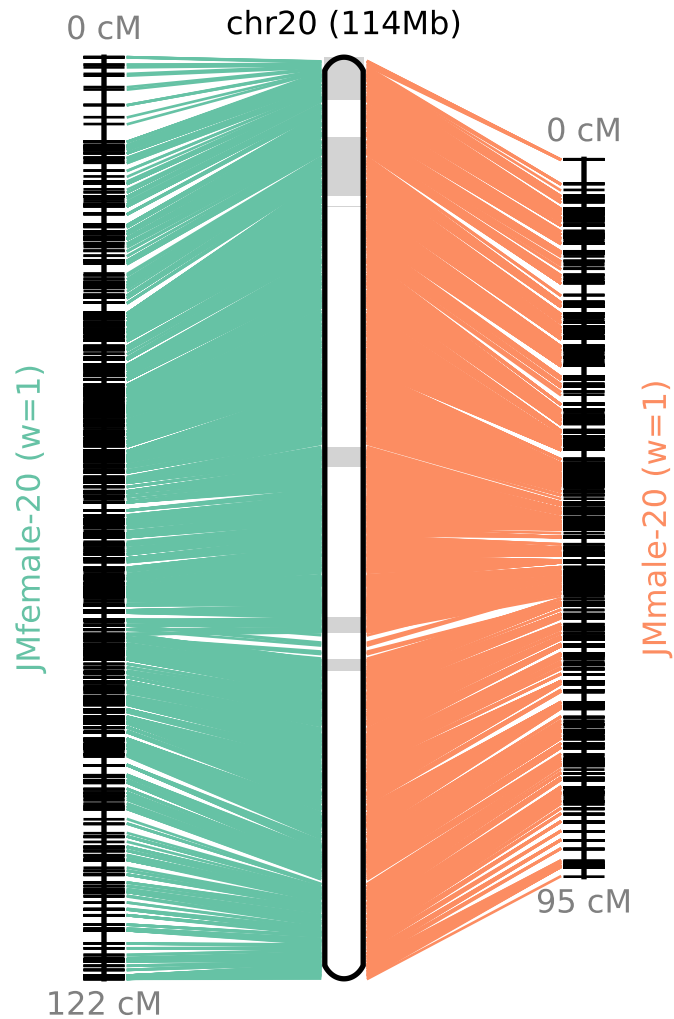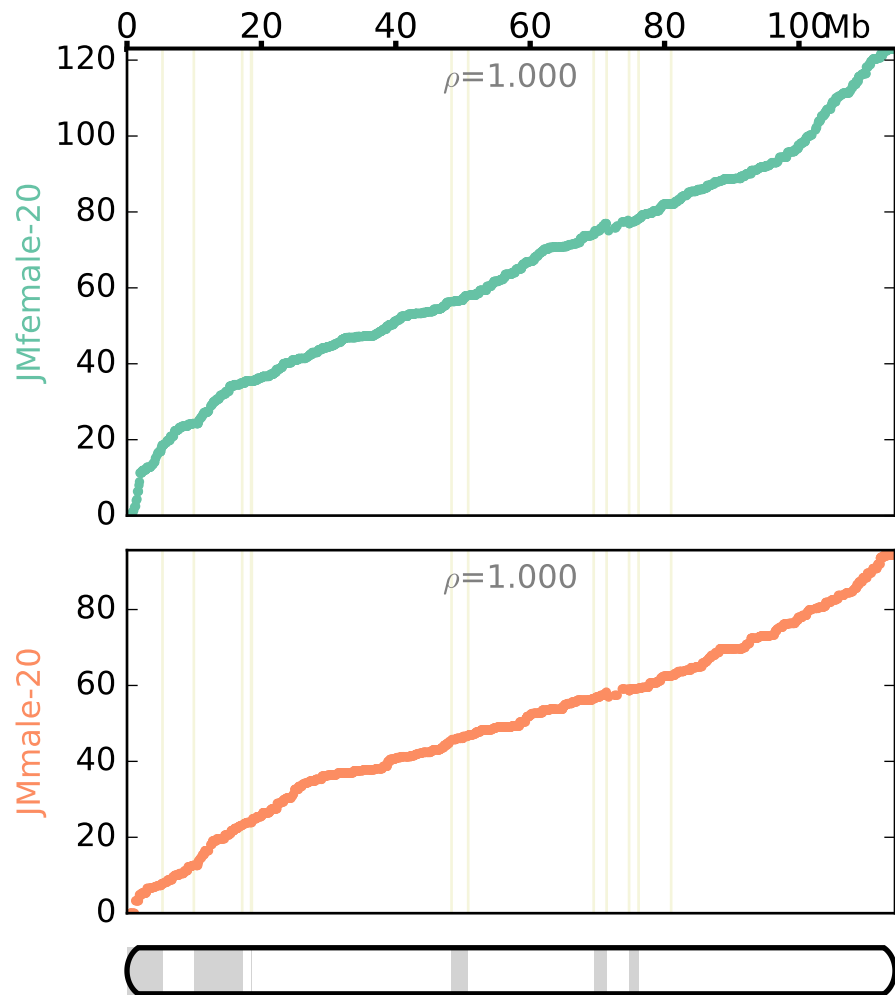

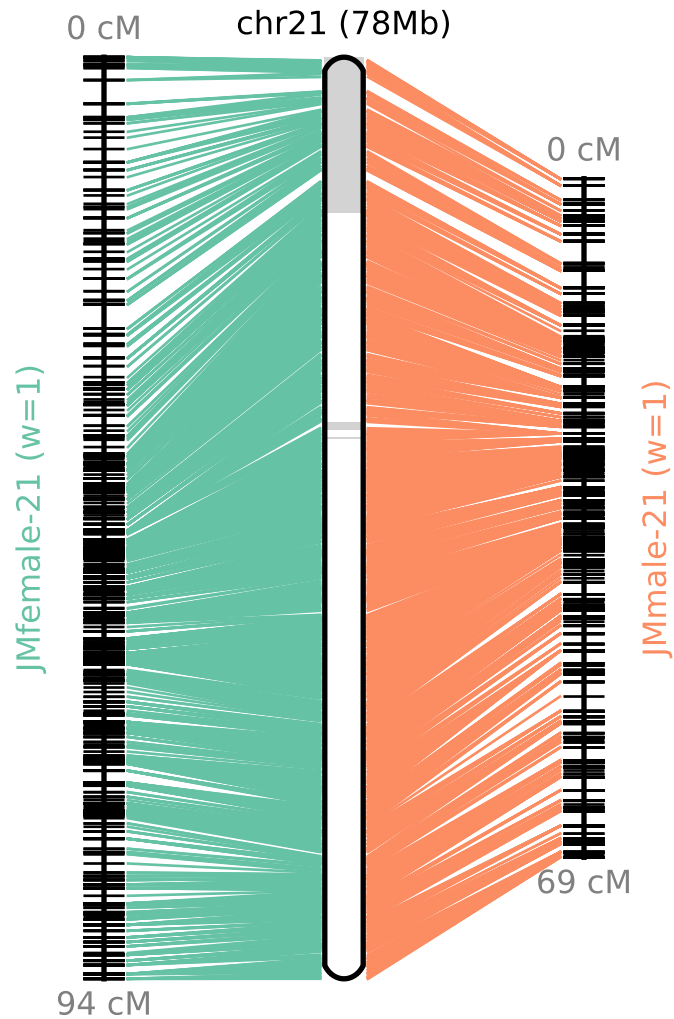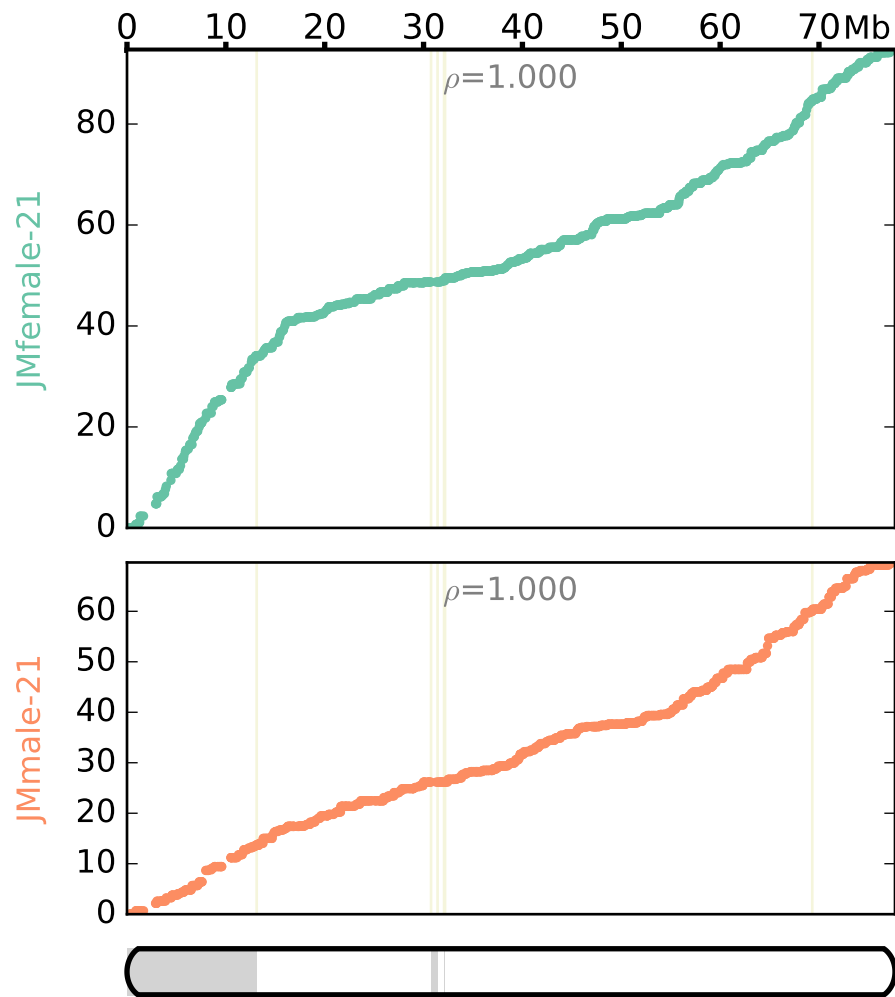

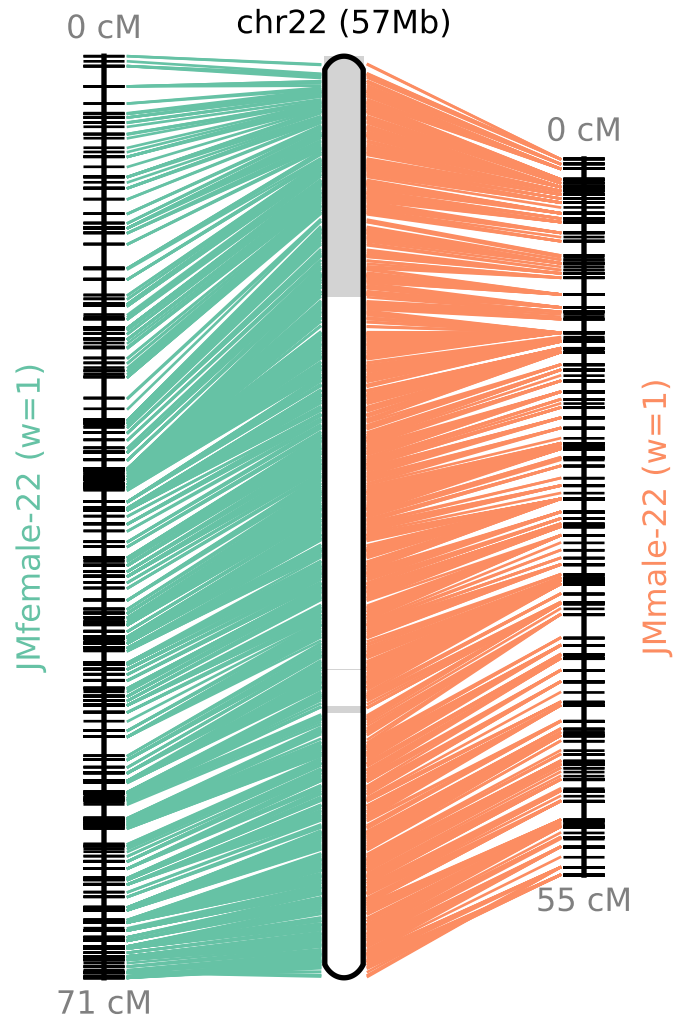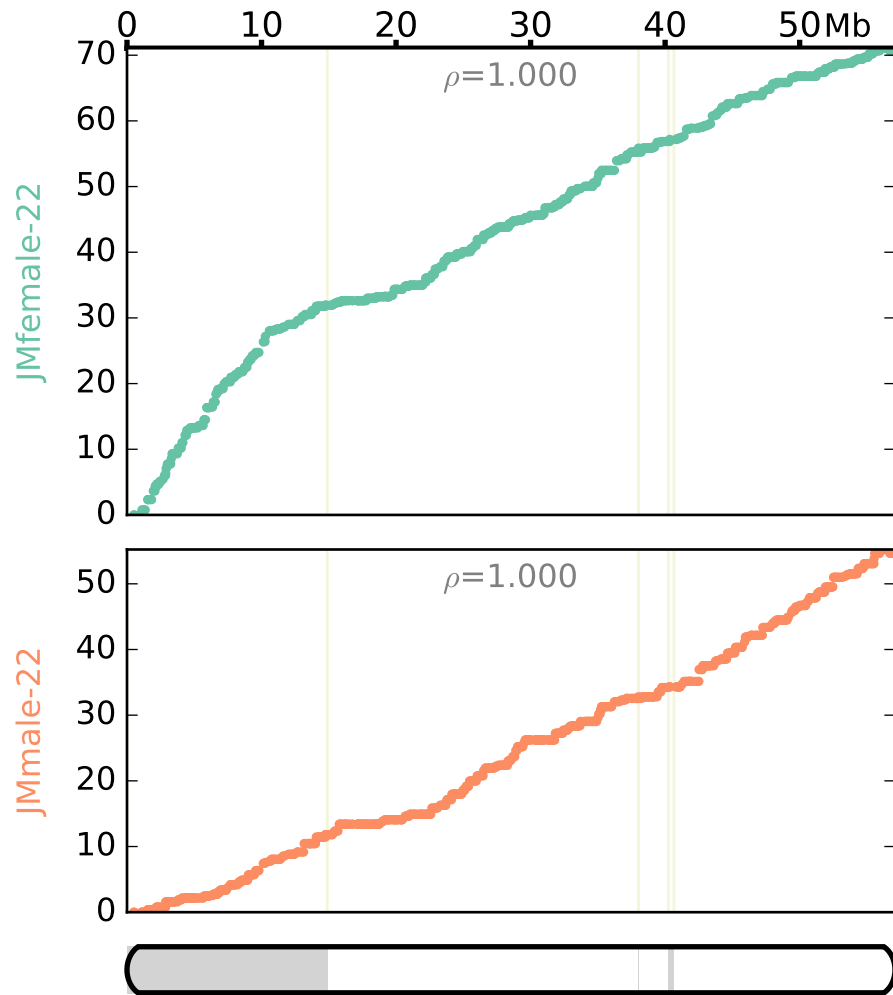

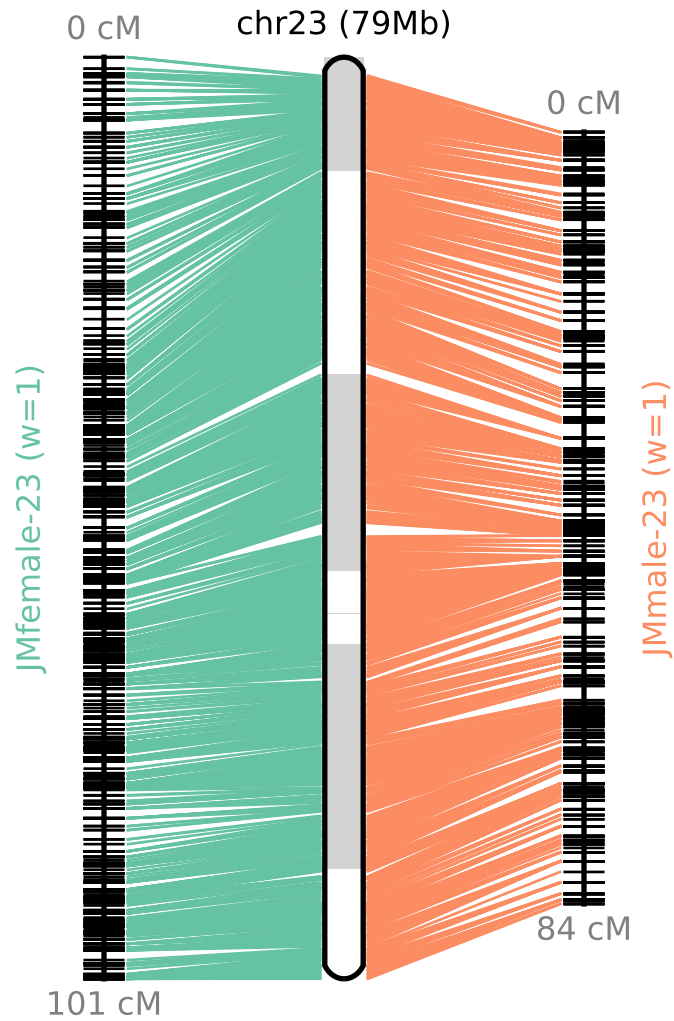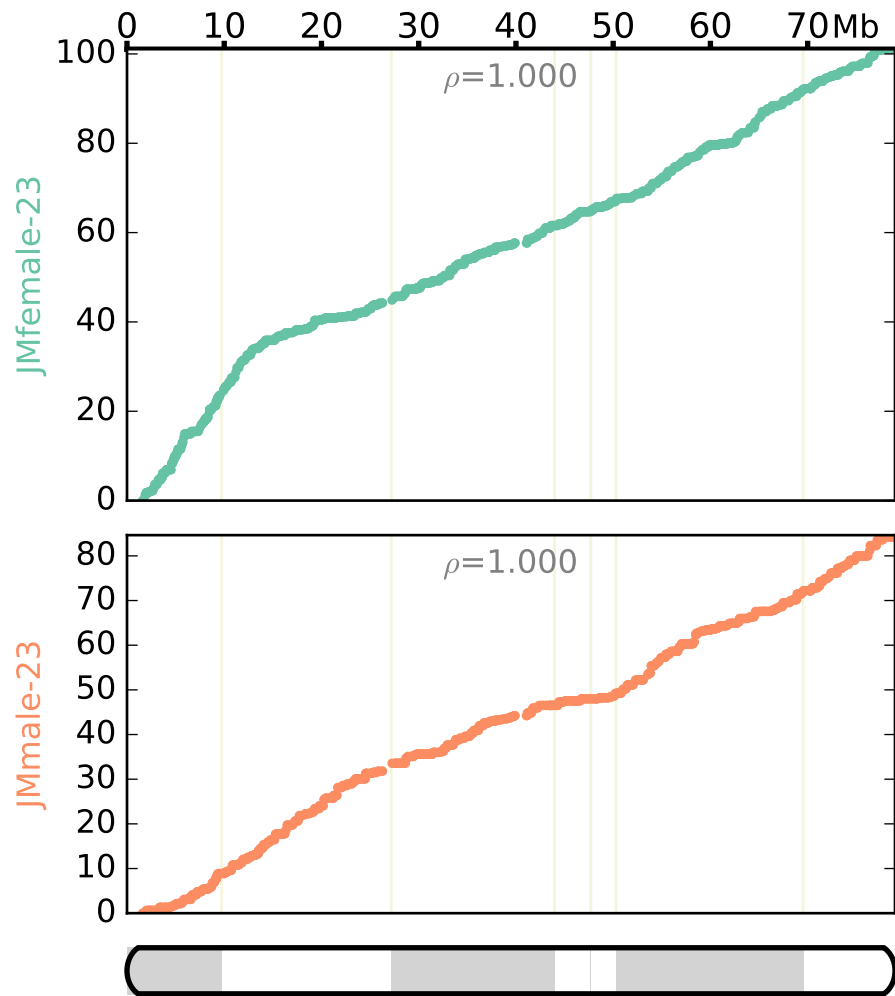



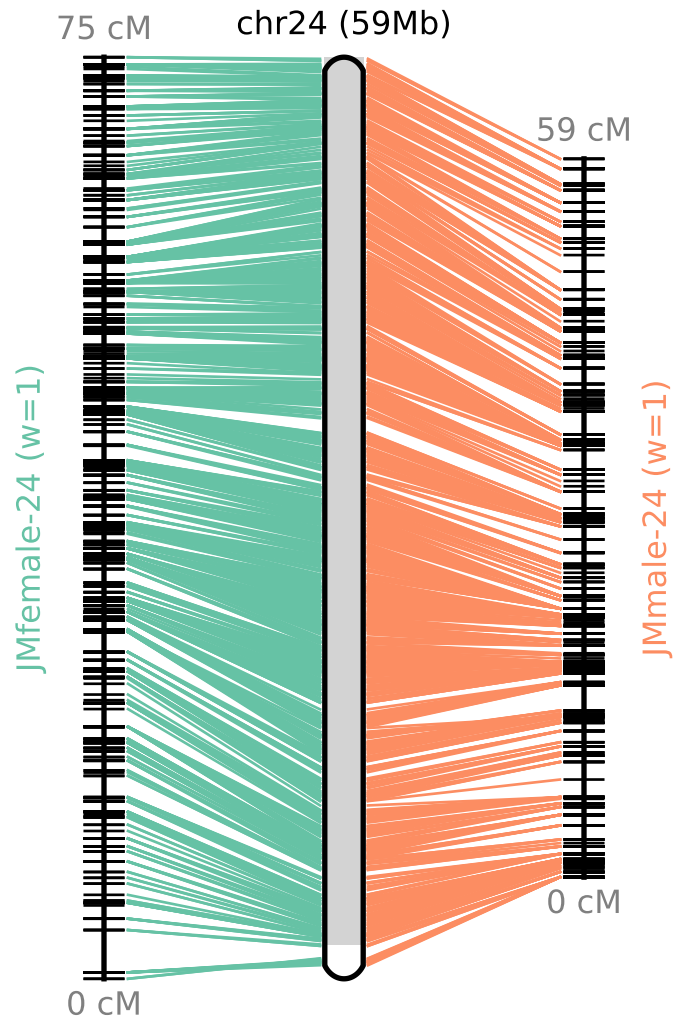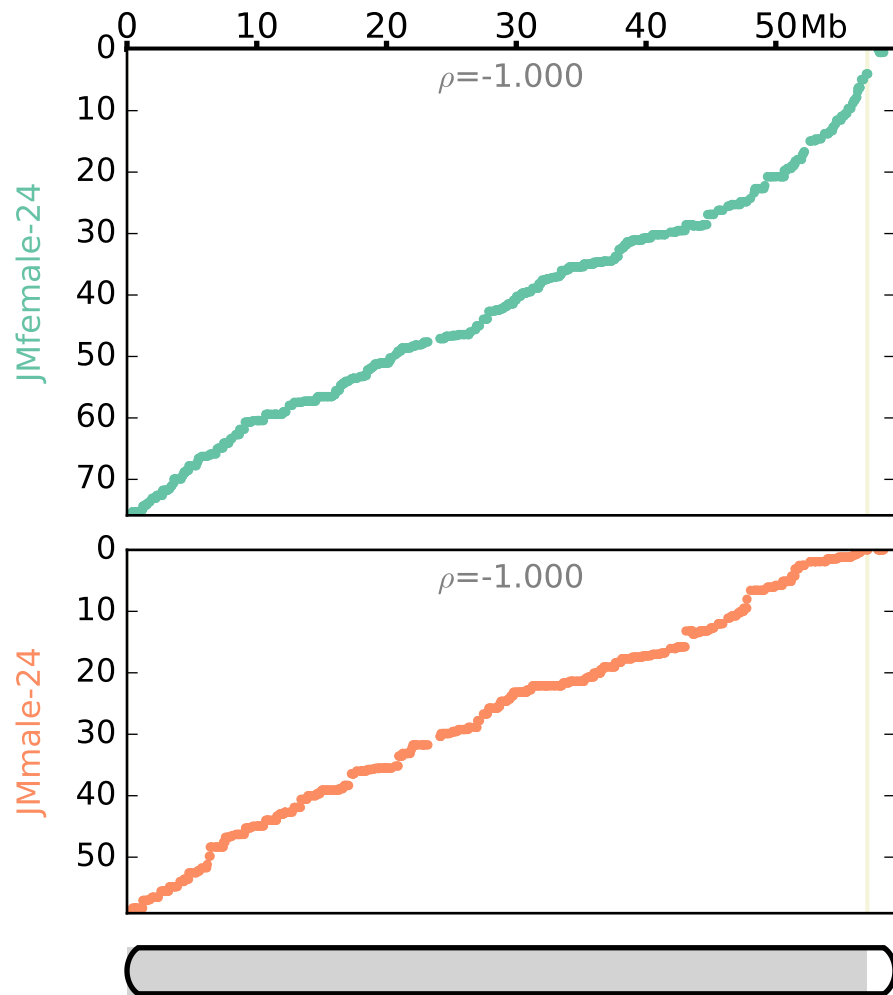

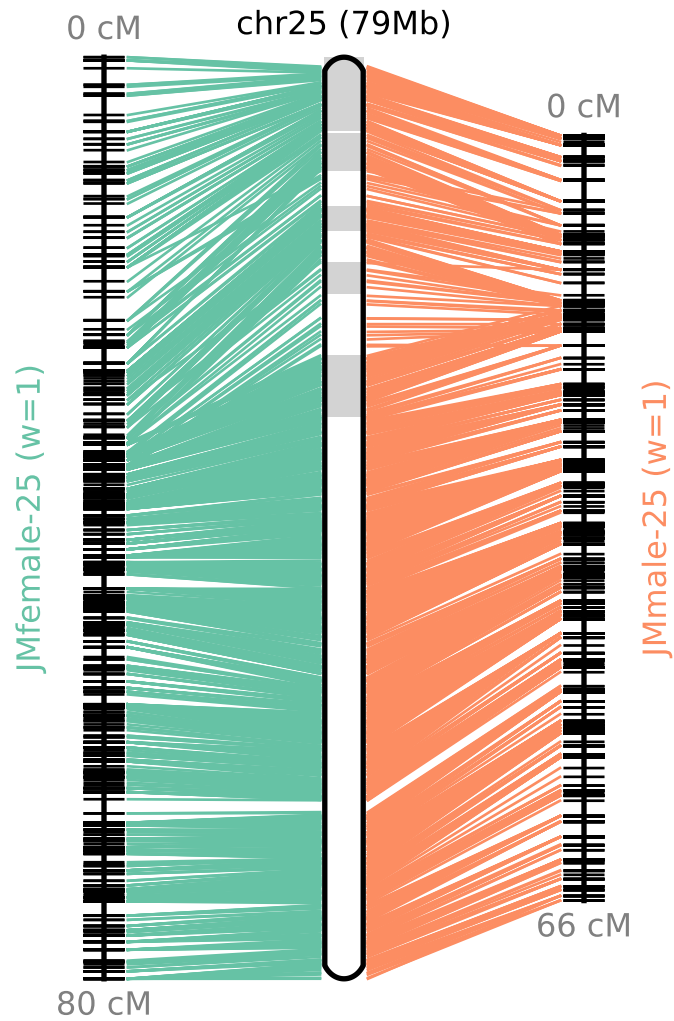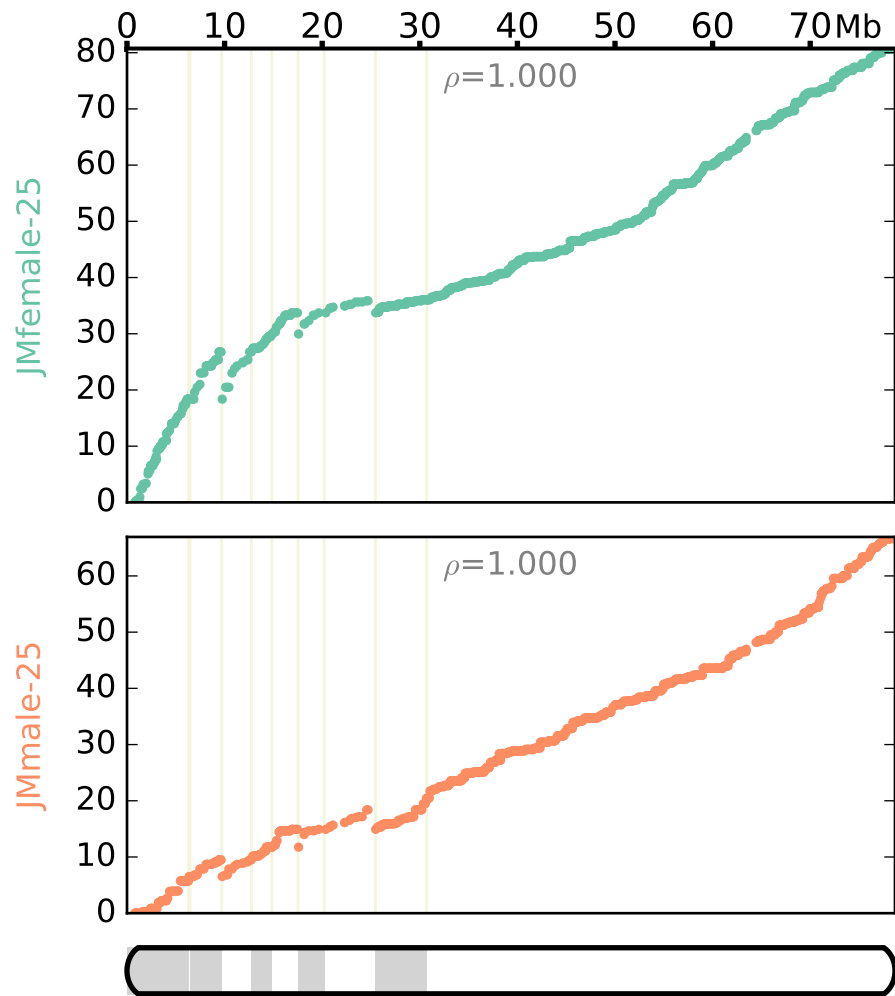

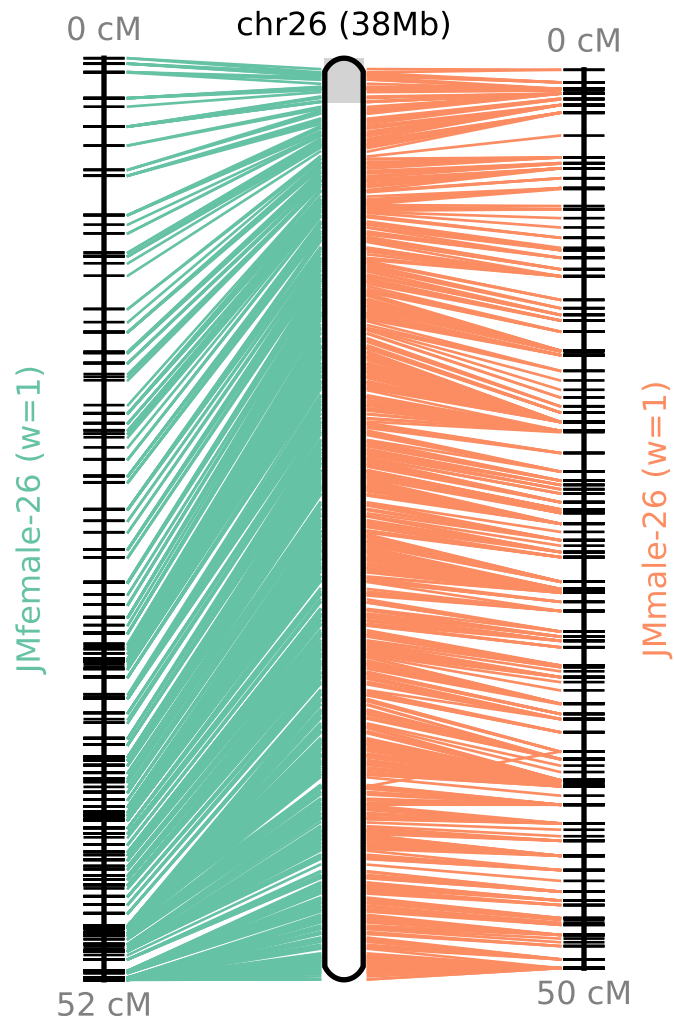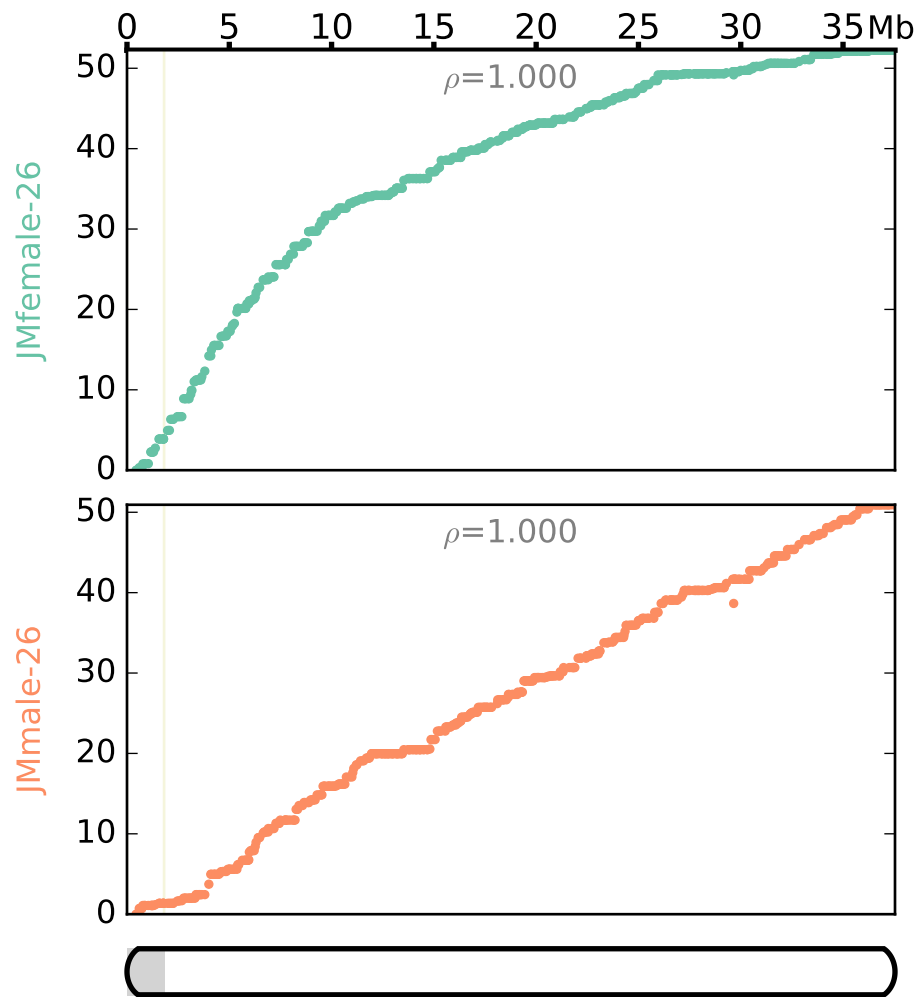

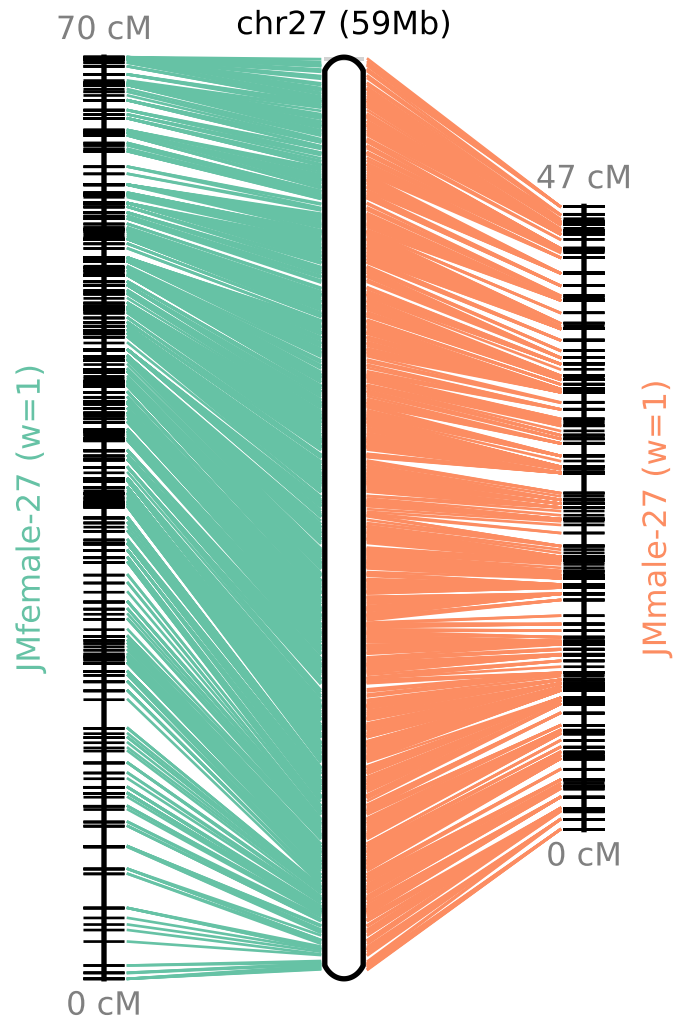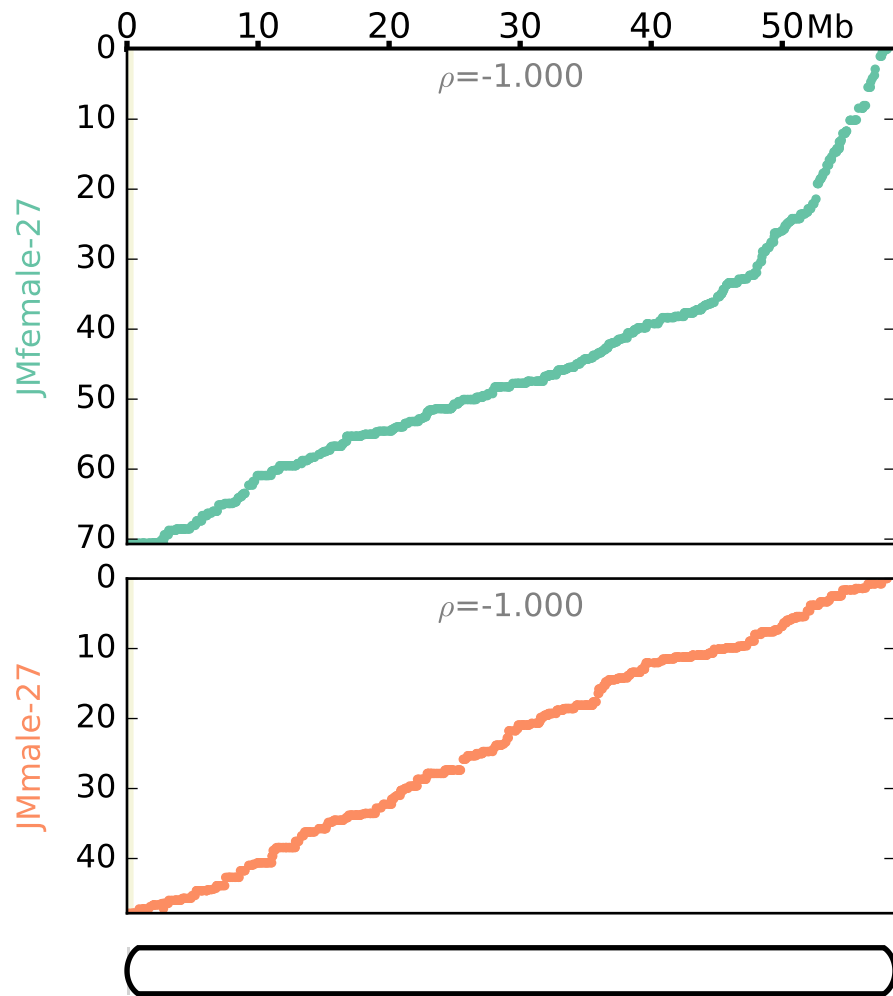

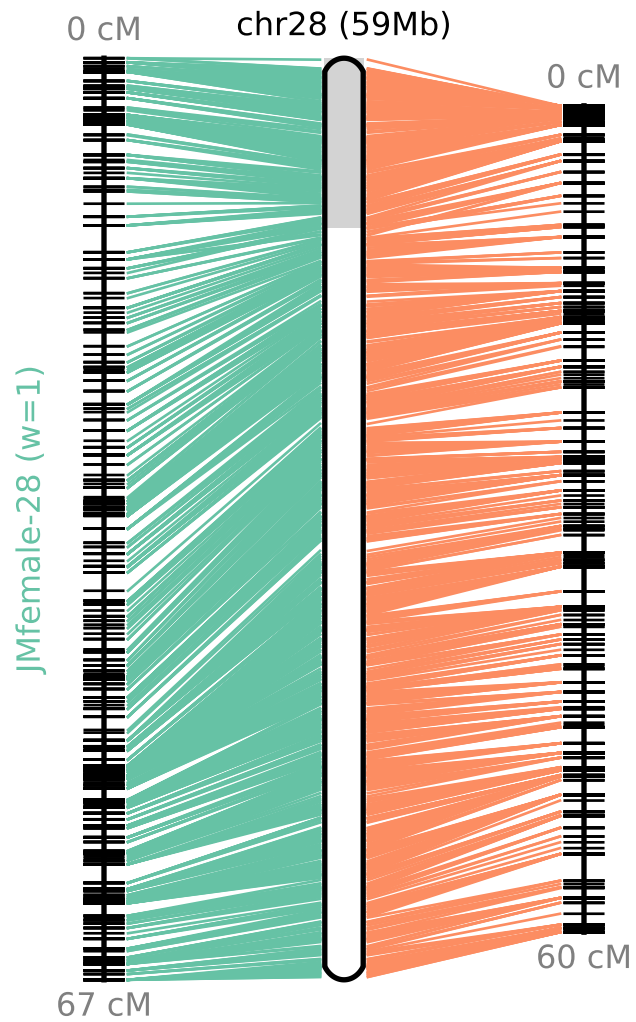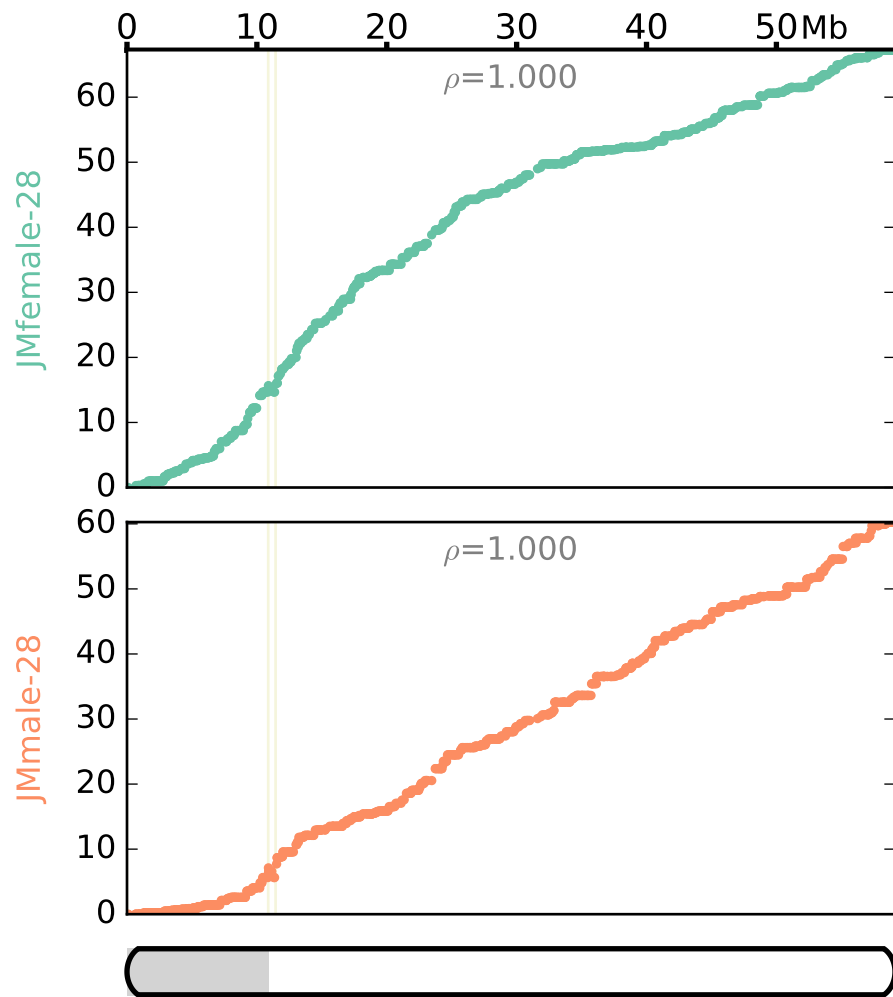

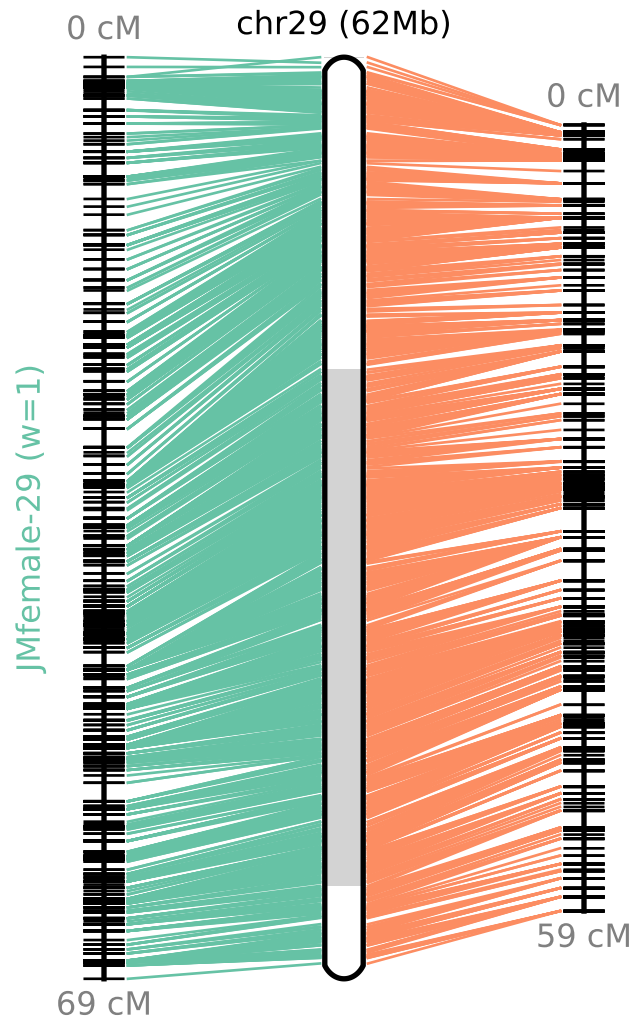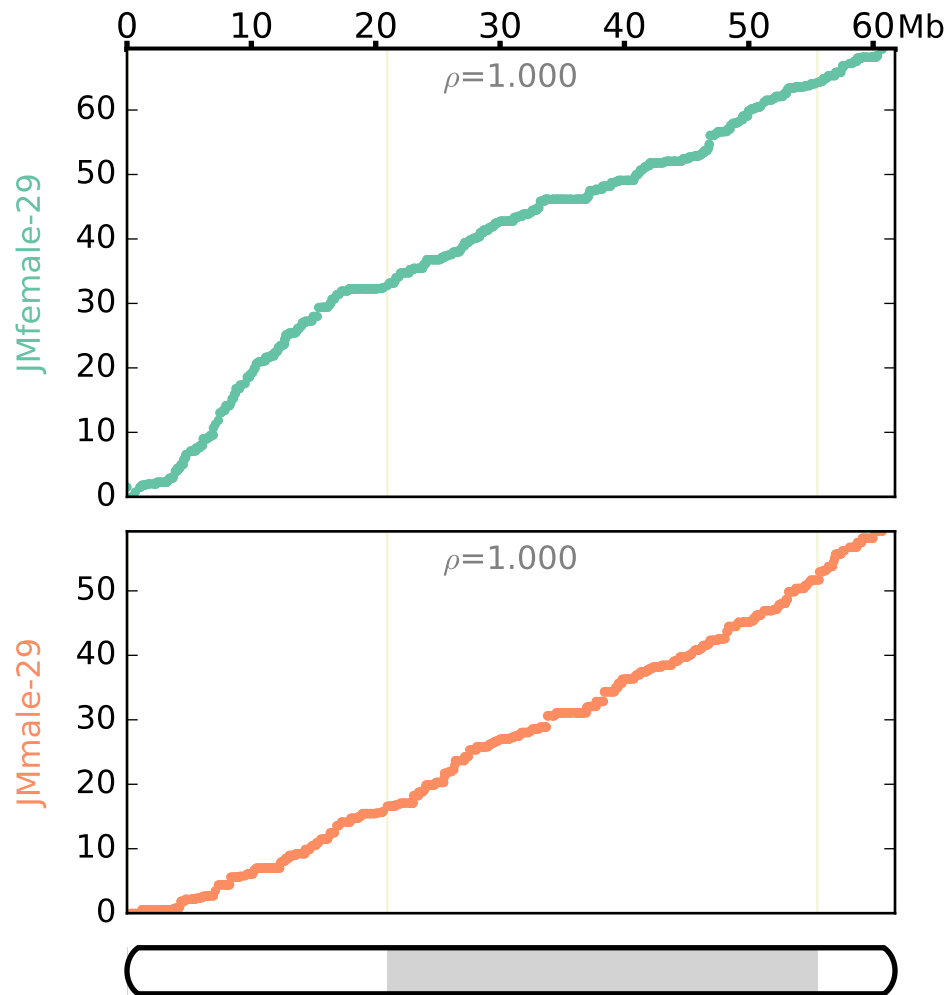

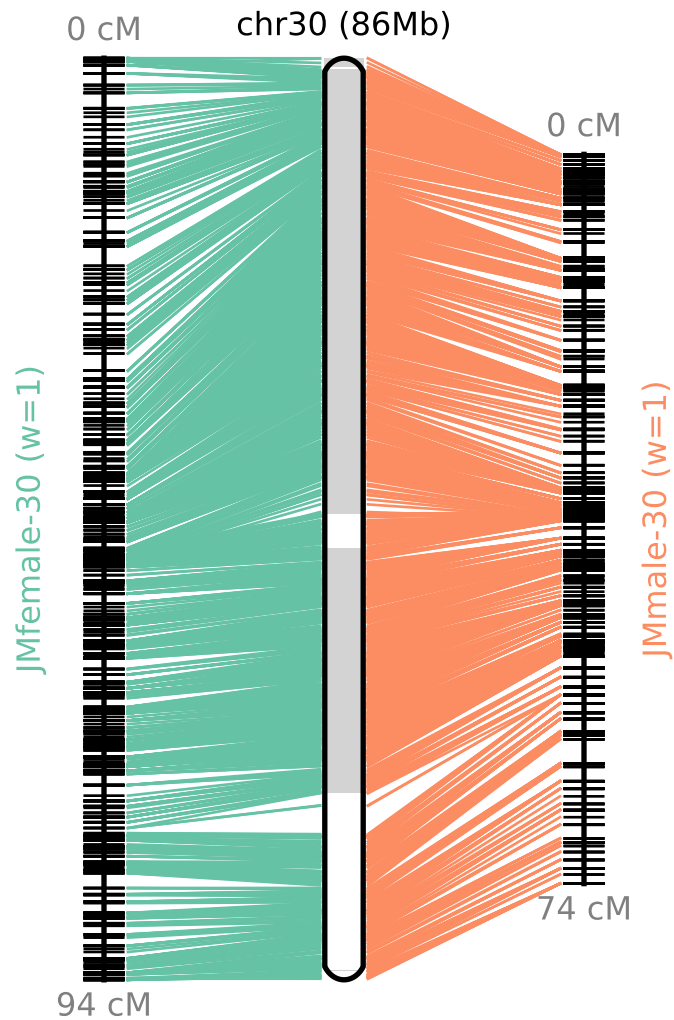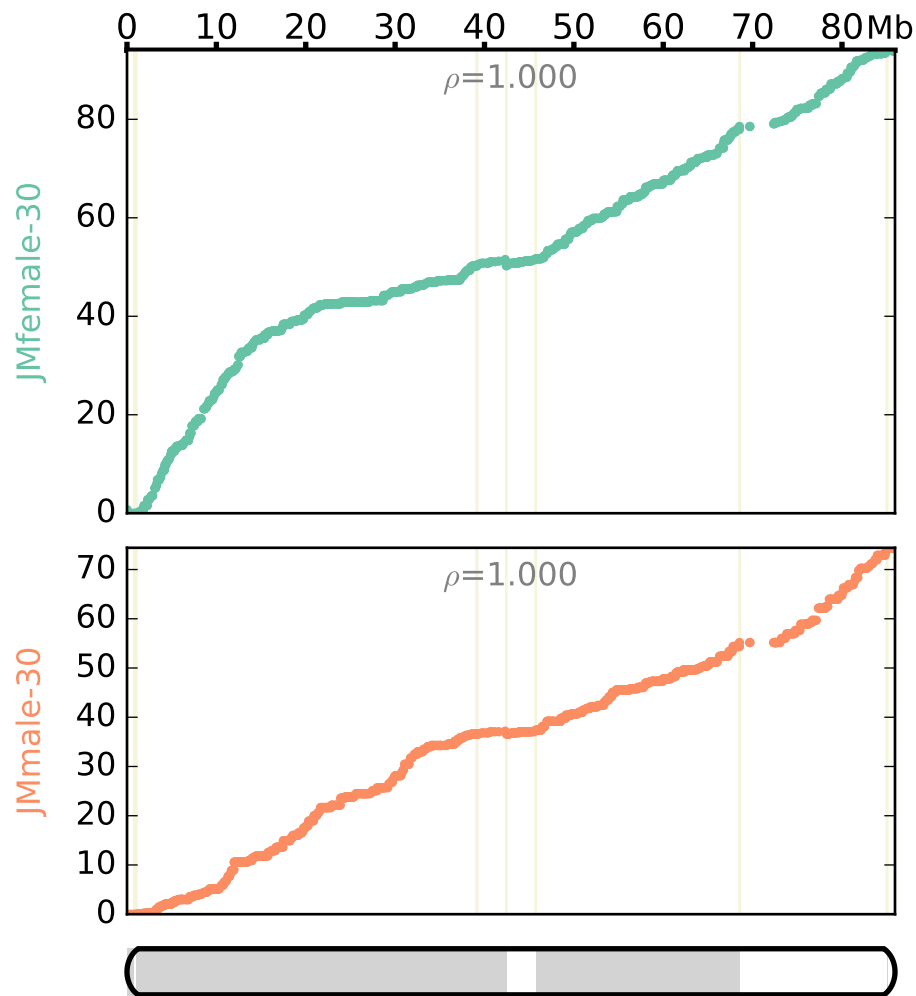

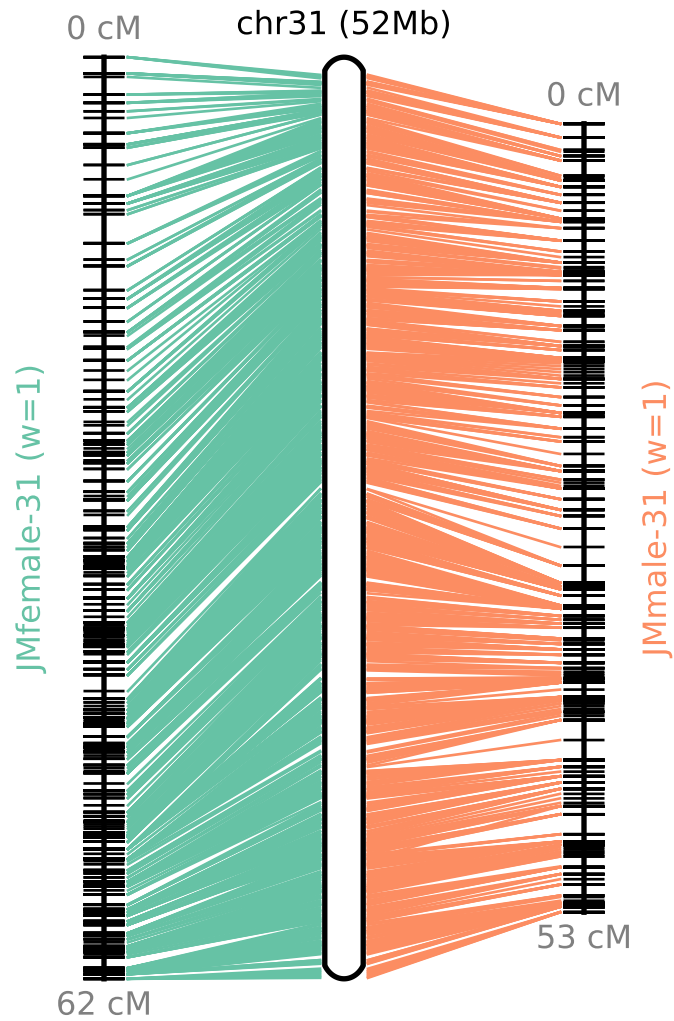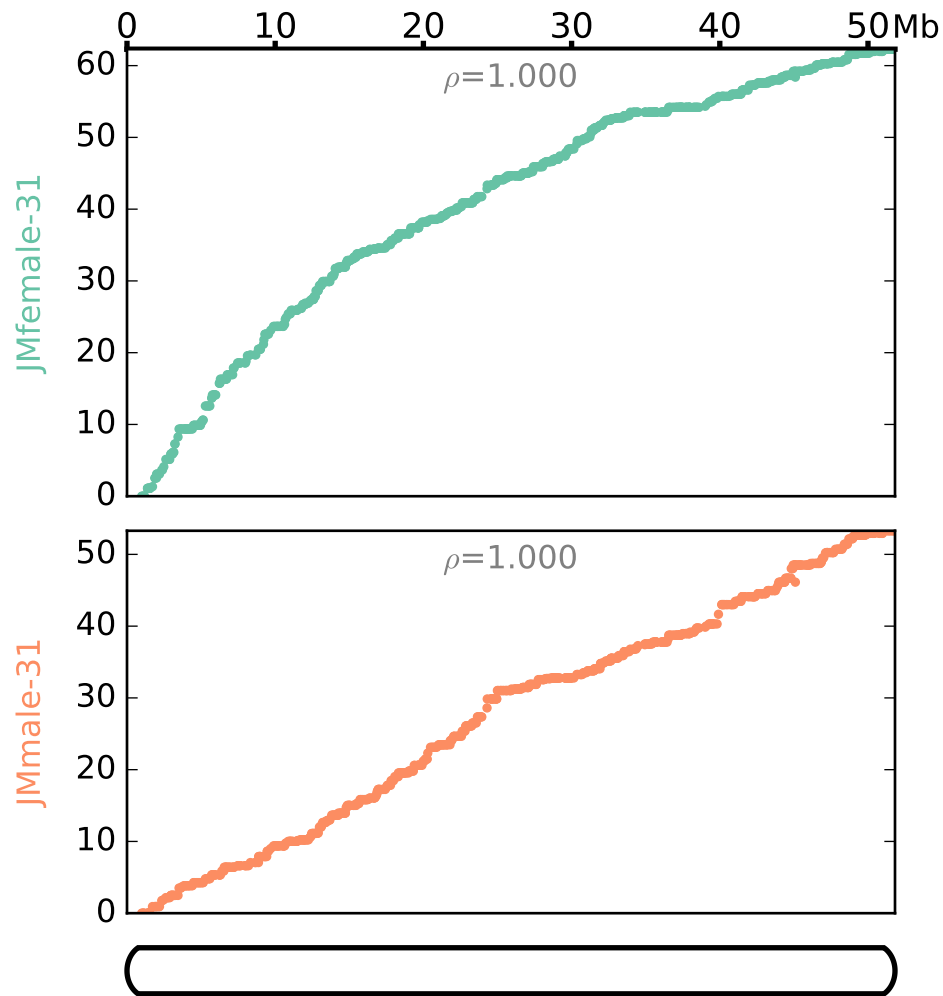



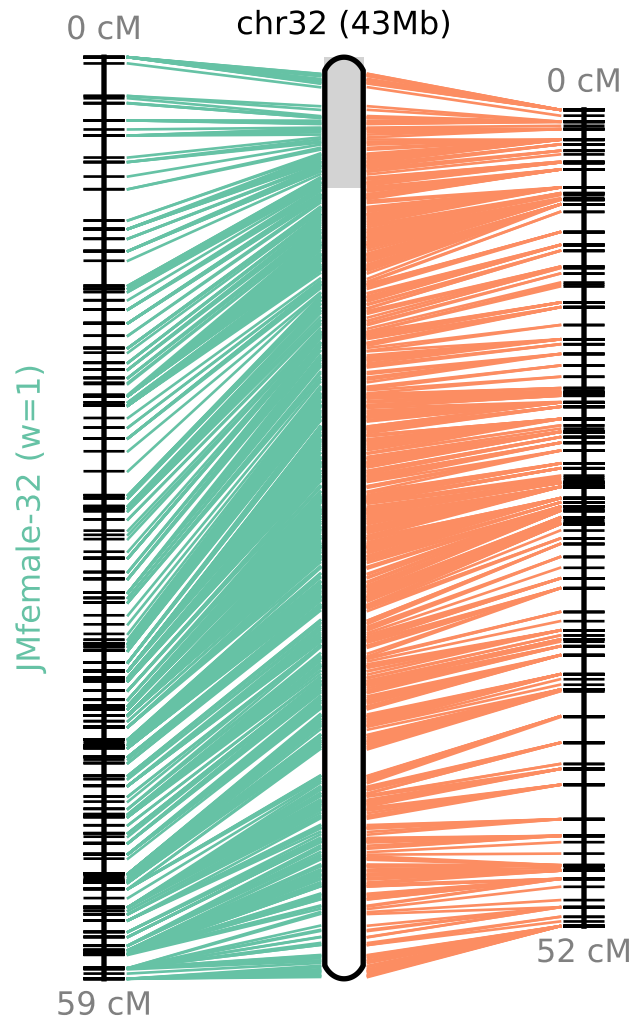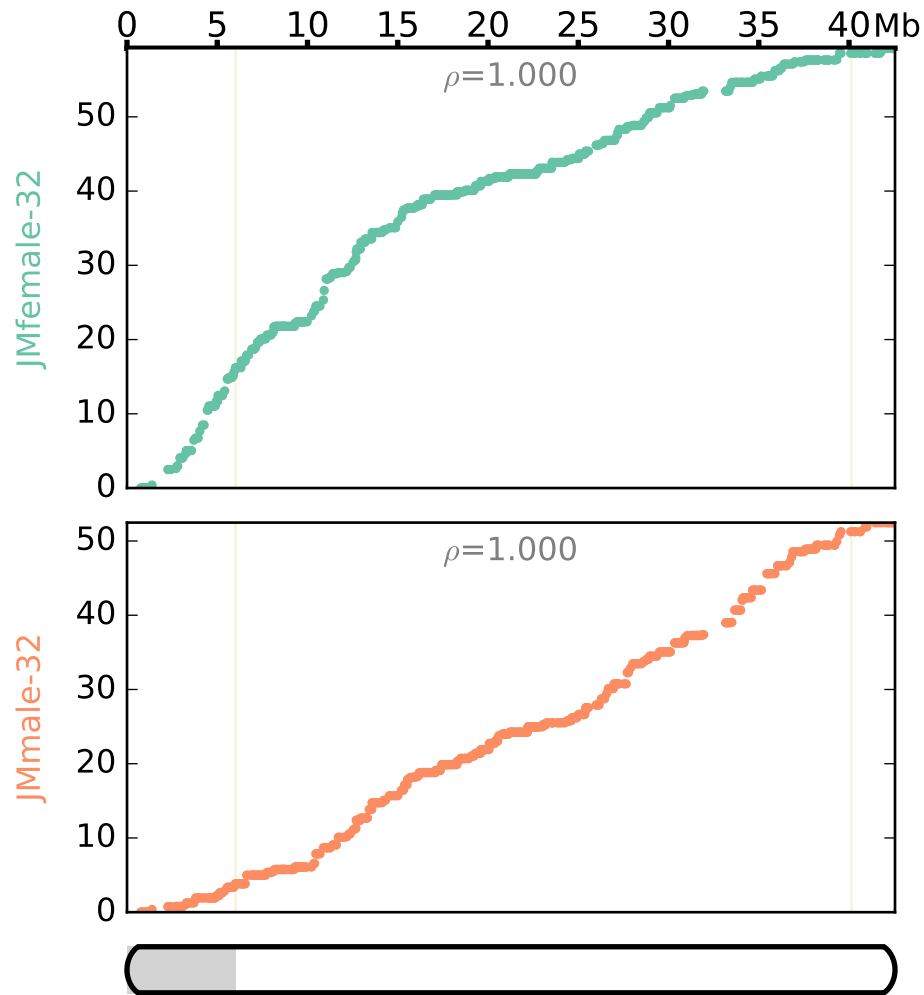

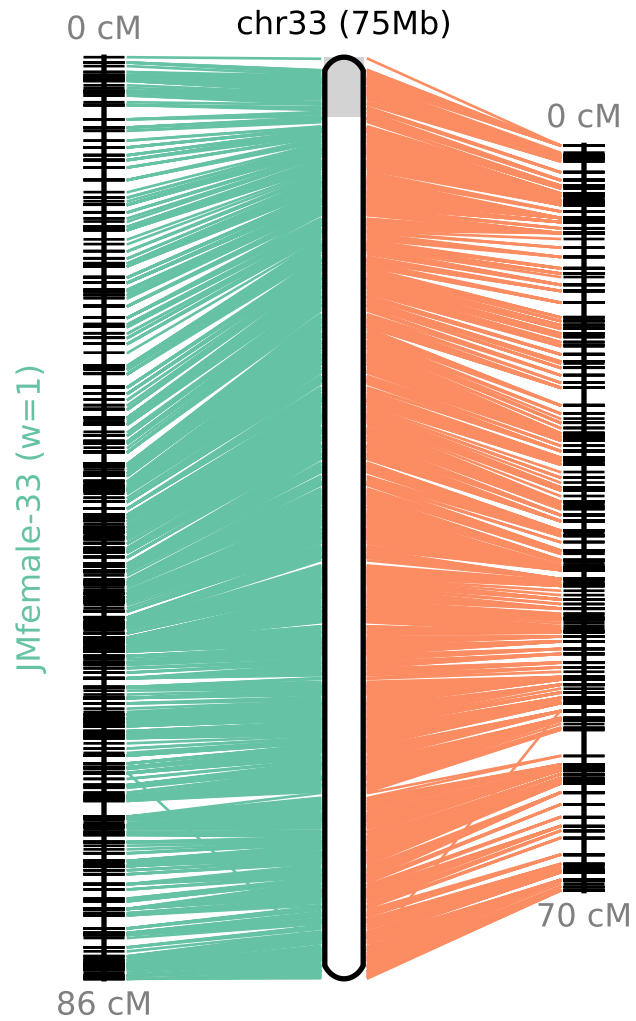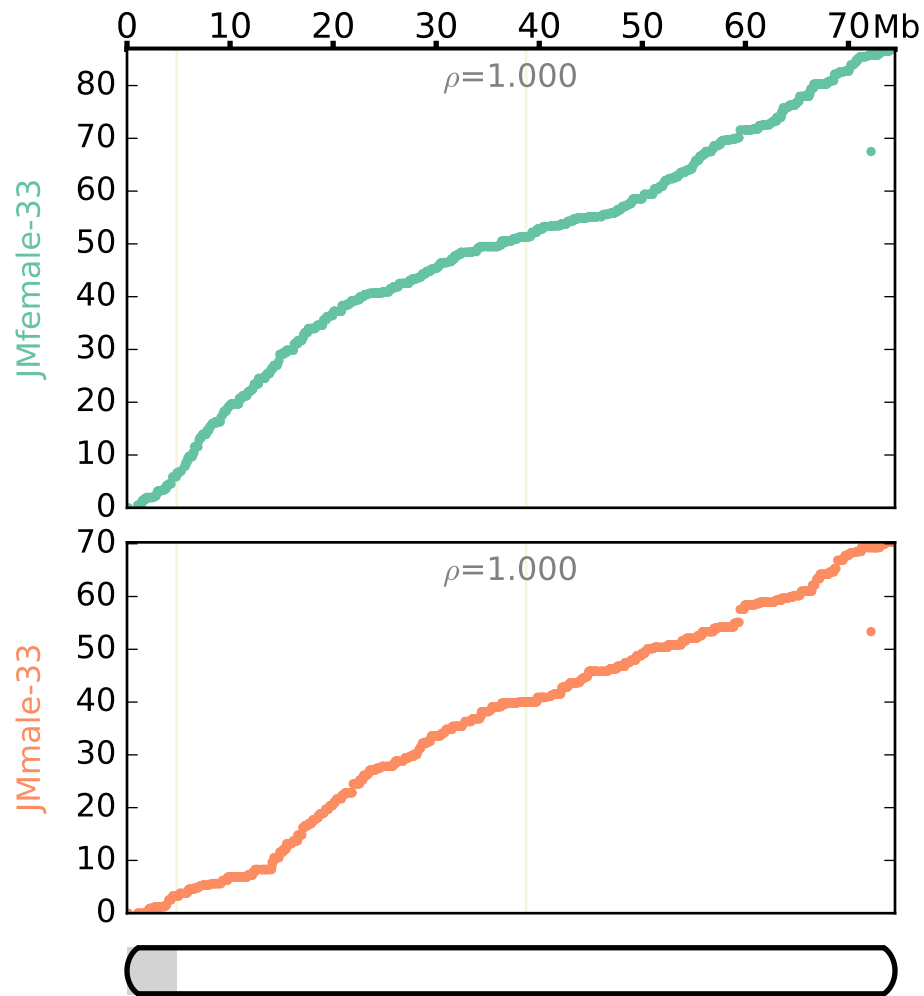

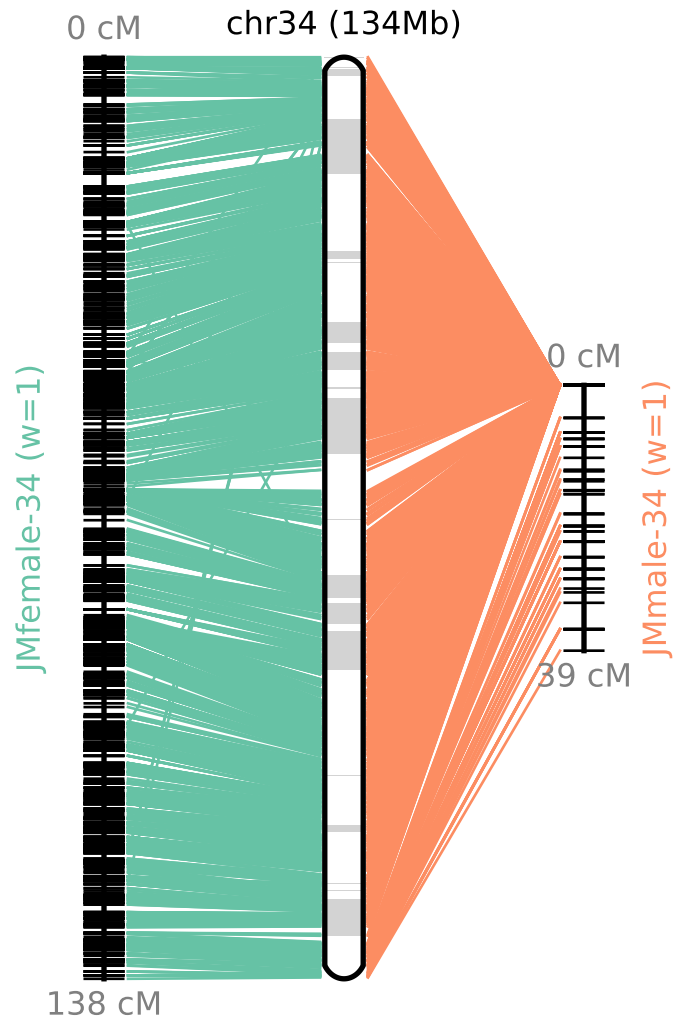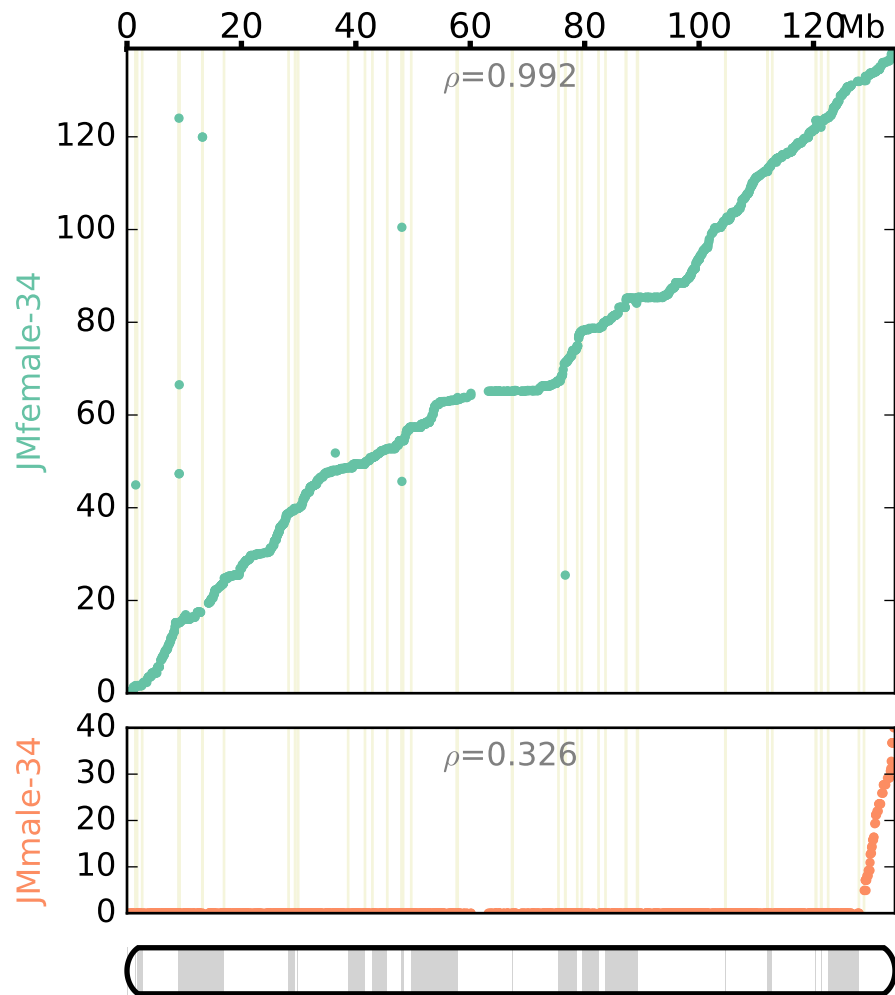

Supplement: 41597_2020_537_MOESM1_ESM.pdf [file 41597_2020_537_MOESM1_ESM.pdf]
